# Supplementary material for: Pseudoscorpions of Israel: Annotated Checklist and Key, With New Records of Two Families (Arachnida: Pseudoscorpiones)
Source: Preprints.org preprint supplement (doi:10.20944/preprints202306.0212.v1), 2023-06-02
Supplement: Supplementary file 3 [file supplementary]

**Supplementary Materials** The following supporting information can be downloaded at: www.mdpi.com/xxx/s1

**Table S1.** Catalog of all specimens deposited at the NNHC, HUJ including Type specimens.

| **Specimen ID** | **Family** | **Scientific Name** | **Specimens** | **Year** | **Month** | **Day** | **Locality** | **Region** | **North** | **East** | **Collectors** |
| --- | --- | --- | --- | --- | --- | --- | --- | --- | --- | --- | --- |
| HUJINVPSE 567 | Cheliferidae | *Dactylochelifer pallidus* | Type | 1940 | October | 27 | Hula | Galil | 33.07 | 35.6 |  |
| HUJINVPSE 571 | Cheliferidae | *Rhacochelifer corcyrensis bicolor* | Allotype | 1951 | May | 4 | Jerusalem | Judea | 31.77 | 35.21 | Wahrman J. W. |
| HUJINVPSE 570 | Cheliferidae | *Rhacochelifer corcyrensis bicolor* | Type | 1957 | August | 16 | En Gedi | Dead Sea | 31.47 | 35.39 | Wahrman J. W. |
| HUJINVPSE 568 | Cheliferidae | *Rhacochelifer longeunguiculatus* | Type | 1944 | March | 19 | En Gedi | Dead Sea | 31.47 | 35.39 | Steinitz |
| HUJINVPSE 569 | Cheliferidae | *Rhacochelifer peculiaris latissimus* | Type | 1944 | January | 7 | Betlehem | Judea | 31.71 | 35.2 | Haas, Steinitz |
| HUJINVPSE 565 | Chernetidae | *Nudochernes spalacis* | Type | 1953 | March | 24 | Jerusalem | Judea | 31.77 | 35.21 |  |
| HUJINVPSE 557 | Chthoniidae | *Ephippiochthonius sacer* | Holotype | 1948 |  |  | Jerusalem | Judea | 31.77 | 35.21 | Theodor |
| HUJINVPSE 563 | Geogarypidae | *Geogarypus pulcher* | Holotype | 1944 | March | 16 | Kfar Mallal | Sharon | 32.17 | 34.89 | Moscona |
| HUJINVPSE 564 | Geogarypidae | *Geogarypus shulovi* | Holotype | 1945 | March | 13 | Dalia | Samaria | 32.59 | 35.07 | Shulov A. |
| HUJINVPSE 560 | Hesperolpiidae | *Calocheirus atopos* | Type | 1944 | March | 17 | Horvot Mezada Plateau | Judea | 31.31 | 35.36 | Steinitz |
| HUJINVPSE 561 | Hesperolpiidae | *Calocheirus atopos* | Allotype | 1952 | March | 24 | Nahal Lavan (= Wadi Abyad) | Negev | 30.95 | 34.39 | Wahrman J. W. |
| HUJINVPSE 562 | Hesperolpiidae | *Cardiolpium stupidum* | Type | 1953 | May | 5 | Aqua Bella (En Hemed) | Judea | 31.8 | 35.13 | Wahrman J. W. |
| HUJINVPSE 558 | Menthidae | *Paramenthus shulovi* | Type | 1959 | March | 11 | Be'er Sheva - Yeruham road (24 km) | Negev | 31.05 | 34.84 | Shulov A. |
| HUJINVPSE 559 | Olpiidae | *Halominniza aegyptiaca litoralis* | Type | 1947 | March | 21 | Aqaba gulf | Arava | 29.54 | 34.97 | Shulov A. |
| HUJINVPSE 566 | Withiidae | *Nannowithius wahrmani* | Type | 1952 | March | 27 | Nahal Lavan (= Wadi Abyad) | Negev | 30.95 | 34.39 | Wahrman J. W. |
| HUJINVPSE 746 | Atemnidae | *Atemnus* | 1 | 2014 | March | 10 | Ein Prat Shever cave | Judean Desert | 31.84 | 35.31 | Aharon S., EGR |
| HUJINVPSE 709 | Cheiridiidae | *Apocheiridium* | 1 | 2018 | July | 31 | Sela cave | Judea desert | 31.25 | 35.23 | Aharon S. |
| HUJINVPSE 832 | Cheliferidae | *Chelifer cancroides* | 1 | 2022 | April | 21 | Pardes Hanna | Emek Hefer | 32.48 | 34.97 | Warburg S. |
| HUJINVPSE 701 | Cheliferidae | *Chelifer cancroides* | 2 | 1963 | April | 28 | Lahav | Negev | 31.38 | 34.86 | Levy G. L. |
| HUJINVPSE 739 | Cheliferidae | *Chelifer cancroides* | 1 | 2021 | March | 23 | Givat Bashit, Asseret | Shfelat Yehudah | 31.84 | 34.74 | Shacham B. |
| HUJINVPSE 364 | Cheliferidae | *Chelifer cancroides* | 1 | 1944 | April | 21 | Jerusalem | Judea | 31.77 | 35.21 |  |
| HUJINVPSE 703 | Cheliferidae | *Chelifer cancroides* | 1 | 2022 | January | 3 | Jerusalem Givat Ram | Judea | 31.77 | 35.2 | Avrech O. |
| HUJINVPSE 738 | Cheliferidae | *Chelifer cancroides* | 1 | 2022 | February | 22 | Jerusalem Givat Ram | Judea | 31.77 | 35.2 | Avrech O. |
| HUJINVPSE 67 | Cheliferidae | *Chelifer cancroides* | 1 | 1945 | August | 9 | Jerusalem - Jericho | Dead Sea | 31.87 | 35.46 | Shulov A. |
| HUJINVPSE 752 | Cheliferidae | *Chelifer cancroides* | 1 | 2022 | February | 24 | Beer Sheva Beehive | Negev | 31.31 | 34.79 | Phavtulov J. |
| HUJINVPSE 63 | Cheliferidae | *Dactylochelifer kussariensis* | 3 | 1944 | February | 19 | bank of river Na'aman | Northern Coastal Plain | 32.91 | 35.09 | Moskona |
| HUJINVPSE 60 | Cheliferidae | *Dactylochelifer pallidus* | 1 | 1940 | April | 15 | Hula | Hula Valley | 33.07 | 35.6 |  |
| HUJINVPSE 62 | Cheliferidae | *Dactylochelifer pallidus* | 1 | 1940 | April | 26 | Hula | Hula Valley | 33.07 | 35.6 |  |
| HUJINVPSE 64 | Cheliferidae | *Dactylochelifer pallidus* | 1 | 1940 | October | 27 | Hula | Hula Valley | 33.07 | 35.6 |  |
| HUJINVPSE 66 | Cheliferidae | *Dactylochelifer pallidus* | 1 | 1940 | March | 21 | Hula Yessod HaMa'ala | Hula Valley | 33.07 | 35.6 |  |
| HUJINVPSE 65 | Cheliferidae | *Dactylochelifer pallidus* | 1 | 1941 | April | 15 | Hula | Hula Valley | 33.07 | 35.6 |  |
| HUJINVPSE 244 | Cheliferidae | *Dactylochelifer pallidus* | 1 | 1967 | April | 19 | Hula Nature Reserve | Hula Valley | 33.07 | 35.6 | Margalith Y. M. |
| HUJINVPSE 231 | Cheliferidae | *Dactylochelifer pallidus* | 1 | 2000 | June | 29 | Hula, Lake | Hula Valley | 33.07 | 35.6 | Dimentman Ch. D. |
| HUJINVPSE 585 | Cheliferidae | *Dactylochelifer pallidus* | 1 | 2017 | June | 11 | Hula Nature Reserve | Hula Valley | 33.07 | 35.6 | Opiliones curse |
| HUJINVPSE 589 | Cheliferidae | *Dactylochelifer pallidus* | 4 | 2017 | June | 11 | Hula Nature Reserve | Hula Valley | 33.07 | 35.6 | Opiliones curse |
| HUJINVPSE 438 | Cheliferidae | *Hysterochelifer* | 2 | 1967 | April | 6 | Mishmar Ha'emek | Jezreel Valley | 32.61 | 35.14 | Costa M. C. |
| HUJINVPSE 425 | Cheliferidae | *Hysterochelifer* | 1 | 1975 | May | 7 | Ramat Rahel | Judea | 31.74 | 35.22 | Faunistics |
| HUJINVPSE 592 | Cheliferidae | *Hysterochelifer* | 2 | 2017 | June | 19 | Hirbat Sa'adim | Judea | 31.75 | 35.13 | Opiliones curse |
| HUJINVPSE 24 | Cheliferidae | *Hysterochelifer cyprius* | 2 | 1944 | March | 28 | Elon | Galilee - Upper Western | 33.07 | 35.21 | Shulov A. |
| HUJINVPSE 26 | Cheliferidae | *Hysterochelifer cyprius* | 6 | 1944 | March | 27 | Elon - Wadi Karkara | Galilee - Upper Western | 33.07 | 35.22 | Haas G. H. |
| HUJINVPSE 32 | Cheliferidae | *Hysterochelifer cyprius* | 1 | 1946 | May | 12 | Daphne` | Galilee - Upper Eastern | 33.24 | 35.64 | Shulov A. |
| HUJINVPSE 22 | Cheliferidae | *Hysterochelifer cyprius* | 1 | 1951 | September | 5 | Rosh Pina | Galilee - Eastern | 32.96 | 35.54 | Amitai P. A. |
| HUJINVPSE 29 | Cheliferidae | *Hysterochelifer cyprius* | 1 | 1951 | September | 5 | Rosh Pina | Galilee - Eastern | 32.96 | 35.54 | Amitai P. A. |
| HUJINVPSE 30 | Cheliferidae | *Hysterochelifer cyprius* | 1 | 1951 | September | 5 | Rosh Pina | Galilee - Eastern | 32.96 | 35.54 | Amitai P. A. |
| HUJINVPSE 47 | Cheliferidae | *Hysterochelifer cyprius* | 1 | 1951 | September | 5 | Rosh Pina | Galilee - Eastern | 32.96 | 35.54 | Amitai P. A. |
| HUJINVPSE 650 | Cheliferidae | *Hysterochelifer cyprius* | 1 | 2020 | May | 10 | JNF Qiryat Shmona | Galilee | 33.2 | 35.57 | Shacham B. |
| HUJINVPSE 48 | Cheliferidae | *Hysterochelifer cyprius* | 1 |  |  |  | Carmel | Carmel | 32.74 | 35.03 |  |
| HUJINVPSE 678 | Cheliferidae | *Hysterochelifer cyprius* | 1 | 1967 | March | 31 | Tivon | Jezreel valley | 32.72 | 35.12 | Costa M. C. |
| HUJINVPSE 251 | Cheliferidae | *Hysterochelifer cyprius* | 1 | 1961 | May | 12 | Ar'ara | Samaria | 32.5 | 35.11 | Amitai P. A. |
| HUJINVPSE 407 | Cheliferidae | *Hysterochelifer cyprius* | 1 | 1961 | May | 12 | Ar'ara | Carmel | 32.5 | 35.11 | Amitai P. A. |
| HUJINVPSE 408 | Cheliferidae | *Hysterochelifer cyprius* | 1 | 1961 | May | 12 | Ar'ara | Carmel | 32.5 | 35.11 | Amitai P. A. |
| HUJINVPSE 409 | Cheliferidae | *Hysterochelifer cyprius* | 1 | 1961 | May | 12 | Ar'ara | Carmel | 32.5 | 35.11 | Amitai P. A. |
| HUJINVPSE 410 | Cheliferidae | *Hysterochelifer cyprius* | 1 | 1961 | May | 12 | Ar'ara | Carmel | 32.5 | 35.11 | Amitai P. A. |
| HUJINVPSE 411 | Cheliferidae | *Hysterochelifer cyprius* | 1 | 1961 | May | 12 | Ar'ara | Carmel | 32.5 | 35.11 | Amitai P. A. |
| HUJINVPSE 412 | Cheliferidae | *Hysterochelifer cyprius* | 1 | 1961 | May | 12 | Ar'ara | Carmel | 32.5 | 35.11 | Amitai P. A. |
| HUJINVPSE 413 | Cheliferidae | *Hysterochelifer cyprius* | 1 | 1961 | May | 12 | Ar'ara | Carmel | 32.5 | 35.11 | Amitai P. A. |
| HUJINVPSE 19 | Cheliferidae | *Hysterochelifer cyprius* | 1 | 1952 | November | 2 | Tel-Aviv-Jaffa | Coastal plain | 32.1 | 34.78 | Wahrman J. W. |
| HUJINVPSE 414 | Cheliferidae | *Hysterochelifer cyprius* | 1 | 1961 | May | 28 | Ylanot | Coastal plain | 32.29 | 34.9 | Halperin J. H. |
| HUJINVPSE 415 | Cheliferidae | *Hysterochelifer cyprius* | 2 | 1961 | June | 19 | Ylanot | Coastal plain | 32.29 | 34.9 | Halperin J. H. |
| HUJINVPSE 416 | Cheliferidae | *Hysterochelifer cyprius* | 1 | 1961 | May | 28 | Ylanot | Coastal plain | 32.29 | 34.9 | Halperin J. H. |
| HUJINVPSE 417 | Cheliferidae | *Hysterochelifer cyprius* | 1 | 1961 | July | 4 | Ylanot | Coastal plain | 32.29 | 34.9 | Halperin J. H. |
| HUJINVPSE 418 | Cheliferidae | *Hysterochelifer cyprius* | 1 | 1961 | June | 21 | Ylanot | Coastal plain | 32.29 | 34.9 | Halperin J. H. |
| HUJINVPSE 454 | Cheliferidae | *Hysterochelifer cyprius* | 1 | 1972 | February | 14 | Sidni Ali | Coastal plain | 32.19 | 34.81 | Tsabar G. T. |
| HUJINVPSE 460 | Cheliferidae | *Hysterochelifer cyprius* | 1 | 1972 | February | 14 | Sidni Ali | Coastal plain | 32.19 | 34.81 | Tsabar G. T. |
| HUJINVPSE 495 | Cheliferidae | *Hysterochelifer cyprius* | 1 | 1972 | February | 14 | Sidni Ali | Coastal plain | 32.19 | 34.81 | Tsabar G. T. |
| HUJINVPSE 496 | Cheliferidae | *Hysterochelifer cyprius* | 1 | 1972 | February | 14 | Sidni Ali | Coastal plain | 32.19 | 34.81 | Tsabar G. T. |
| HUJINVPSE 507 | Cheliferidae | *Hysterochelifer cyprius* | 1 | 1972 | February | 14 | Sidni Ali | Coastal plain | 32.19 | 34.81 | Tsabar G. T. |
| HUJINVPSE 532 | Cheliferidae | *Hysterochelifer cyprius* | 1 | 1972 | February | 14 | Sidni Ali | Coastal plain | 32.19 | 34.81 | Tsabar G. T. |
| HUJINVPSE 534 | Cheliferidae | *Hysterochelifer cyprius* | 1 | 1972 | February | 14 | Sidni Ali | Coastal plain | 32.19 | 34.81 | Tsabar G. T. |
| HUJINVPSE 291 | Cheliferidae | *Hysterochelifer cyprius* | 1 | 1965 | January | 20 | Bet Dagan | Coastal plain | 31.99 | 34.83 | Amitai P. A. |
| HUJINVPSE 490 | Cheliferidae | *Hysterochelifer cyprius* | 1 | 1971 | April | 23 | Rishon Le'Zion | Coastal plain | 31.95 | 34.78 | Tsabar G. T. |
| HUJINVPSE 529 | Cheliferidae | *Hysterochelifer cyprius* | 29 | 1980 | April | 8 | Lod | Coastal plain | 31.96 | 34.88 | Galker E. G. |
| HUJINVPSE 652 | Cheliferidae | *Hysterochelifer cyprius* | 1 | 2017 | November | 18 | Soreq swamp | Shfelat Yehudah | 31.94 | 34.73 | Shacham B. |
| HUJINVPSE 662 | Cheliferidae | *Hysterochelifer cyprius* | 1 | 2017 | April | 1 | Ashdod sand dunes | Southern Coastal Plain | 31.76 | 34.63 | Shacham B. |
| HUJINVPSE 665 | Cheliferidae | *Hysterochelifer cyprius* | 1 | 2017 | April | 7 | Ashdod sand dunes | Southern Coastal Plain | 31.76 | 34.63 | Shacham B. |
| HUJINVPSE 669 | Cheliferidae | *Hysterochelifer cyprius* | 1 | 2017 | November | 18 | Soreq swamp | Shfelat Yehudah | 31.94 | 34.73 | Shacham B. |
| HUJINVPSE 670 | Cheliferidae | *Hysterochelifer cyprius* | 1 | 2017 | November | 28 | Ashdod sand dunes | Southern Coastal Plain | 31.76 | 34.63 | Shacham B. |
| HUJINVPSE 673 | Cheliferidae | *Hysterochelifer cyprius* | 1 | 2017 | November | 18 | Soreq swamp | Shfelat Yehudah | 31.94 | 34.73 | Shacham B. |
| HUJINVPSE 656 | Cheliferidae | *Hysterochelifer cyprius* | 1 | 2019 | December | 12 | Ashdod sand dunes | Southern Coastal Plain | 31.76 | 34.63 | Shacham B. |
| HUJINVPSE 658 | Cheliferidae | *Hysterochelifer cyprius* | 2 | 2019 | April |  | Yad Mordechai cemetary | Southern Coastal Plain | 31.6 | 34.55 | Shacham B. |
| HUJINVPSE 659 | Cheliferidae | *Hysterochelifer cyprius* | 1 | 2019 | April |  | Yad Mordechai cemetary | Southern Coastal Plain | 31.6 | 34.55 | Shacham B. |
| HUJINVPSE 935 | Cheliferidae | *Hysterochelifer cyprius* | 4 | 2022 | October | 29 | Nahal Shiqma near Or Haner | Southern coastal Plain | 31.56 | 34.61 | Shacham B. |
| HUJINVPSE 33 | Cheliferidae | *Hysterochelifer cyprius* | 1 | 1952 | June | 20 | Hartuv | Shfelat Yehudah | 31.77 | 34.99 | Pener M. P. |
| HUJINVPSE 21 | Cheliferidae | *Hysterochelifer cyprius* | 10 | 1957 | August | 1 | Hartuv | Shfelat Yehudah | 31.38 | 34.86 | Wahrman J. W. |
| HUJINVPSE 25 | Cheliferidae | *Hysterochelifer cyprius* | 1 | 1957 | June | 20 | Hartuv | Shfelat Yehudah | 30.99 | 34.73 | Pener M. P. |
| HUJINVPSE 27 | Cheliferidae | *Hysterochelifer cyprius* | 1 | 1957 | June | 20 | Hartuv | Shfelat Yehudah | 30.61 | 34.6 | Pener M. P. |
| HUJINVPSE 31 | Cheliferidae | *Hysterochelifer cyprius* | 1 | 1957 | June | 20 | Hartuv | Shfelat Yehudah | 30.22 | 34.47 | Pener M. P. |
| HUJINVPSE 36 | Cheliferidae | *Hysterochelifer cyprius* | 1 | 1957 | June | 20 | Hartuv | Shfelat Yehudah | 29.84 | 34.34 | Pener M. P. |
| HUJINVPSE 41 | Cheliferidae | *Hysterochelifer cyprius* | 1 | 1957 | June | 20 | Hartuv | Shfelat Yehudah | 29.45 | 34.21 | Pener M. P. |
| HUJINVPSE 42 | Cheliferidae | *Hysterochelifer cyprius* | 1 | 1957 | June | 20 | Hartuv | Shfelat Yehudah | 29.06 | 34.08 | Pener M. P. |
| HUJINVPSE 43 | Cheliferidae | *Hysterochelifer cyprius* | 1 | 1957 | June | 20 | Hartuv | Shfelat Yehudah | 28.68 | 33.95 | Pener M. P. |
| HUJINVPSE 49 | Cheliferidae | *Hysterochelifer cyprius* | 1 | 1957 | June | 20 | Hartuv | Shfelat Yehudah | 28.29 | 33.83 | Pener M. P. |
| HUJINVPSE 50 | Cheliferidae | *Hysterochelifer cyprius* | 1 | 1957 | June | 20 | Hartuv | Shfelat Yehudah | 27.9 | 33.7 | Pener M. P. |
| HUJINVPSE 55 | Cheliferidae | *Hysterochelifer cyprius* | 5 | 1957 | May | 26 | Hartuv | Shfelat Yehudah | 27.52 | 33.57 | Wahrman J. |
| HUJINVPSE 44 | Cheliferidae | *Hysterochelifer cyprius* | 1 | 1958 | June | 20 | Hartuv | Shfelat Yehudah | 27.13 | 33.44 | Pener M. P. |
| HUJINVPSE 260 | Cheliferidae | *Hysterochelifer cyprius* | 1 | 1961 | August | 30 | Lahav | Negev | 31.38 | 34.86 | Pener M. P. |
| HUJINVPSE 315 | Cheliferidae | *Hysterochelifer cyprius* | 1 | 1961 | August | 17 | Hartuv | Shfelat Yehudah | 27.13 | 33.44 | Amitai P. A. |
| HUJINVPSE 329 | Cheliferidae | *Hysterochelifer cyprius* | 1 | 1961 | August | 17 | Hartuv | Shfelat Yehudah | 27.13 | 33.44 | Amitai P. A. |
| HUJINVPSE 402 | Cheliferidae | *Hysterochelifer cyprius* | 1 | 1961 | August | 17 | Hartuv | Shfelat Yehudah | 27.13 | 33.44 | Amitai P. A. |
| HUJINVPSE 240 | Cheliferidae | *Hysterochelifer cyprius* | 1 | 1963 | April | 28 | Lahav | Negev | 31.38 | 34.86 | Levy G. L. |
| HUJINVPSE 651 | Cheliferidae | *Hysterochelifer cyprius* | 1 | 2017 | December | 4 | Tel Mahoz | Shfelat Yehudah | 31.92 | 34.74 | Shacham B. |
| HUJINVPSE 657 | Cheliferidae | *Hysterochelifer cyprius* | 1 | 2017 | December | 4 | Tel Mahoz | Shfelat Yehudah | 31.92 | 34.74 | Shacham B. |
| HUJINVPSE 660 | Cheliferidae | *Hysterochelifer cyprius* | 1 | 2017 | December | 4 | Tel Mahoz | Shfelat Yehudah | 31.92 | 34.74 | Shacham B. |
| HUJINVPSE 666 | Cheliferidae | *Hysterochelifer cyprius* | 1 | 2017 | December | 4 | Tel Mahoz | Shfelat Yehudah | 31.92 | 34.74 | Shacham B. |
| HUJINVPSE 601 | Cheliferidae | *Hysterochelifer cyprius* | 3 | 2018 | February | 27 | Canada Park | Shfelat Yehudah | 31.84 | 35 | Sinaiko G. |
| HUJINVPSE 23 | Cheliferidae | *Hysterochelifer cyprius* | 1 | 1944 | March | 6 | E of Ras Abu Amar | Judea | 31.73 | 35.11 |  |
| HUJINVPSE 20 | Cheliferidae | *Hysterochelifer cyprius* | 1 | 1952 | August | 5 | Qiryat Anavim | Judea | 31.81 | 35.12 | Wahrman J. W. |
| HUJINVPSE 28 | Cheliferidae | *Hysterochelifer cyprius* | 1 | 1952 | October | 12 | Qiryat Anavim | Judea | 31.81 | 35.12 | Wahrman J. W. |
| HUJINVPSE 278 | Cheliferidae | *Hysterochelifer cyprius* | 1 | 1961 | June | 17 | Hirbat Sa'adim, (Khirbat Saida) | Judea | 31.75 | 35.13 | Wahrman |
| HUJINVPSE 482 | Cheliferidae | *Hysterochelifer cyprius* | 1 | 1964 | March | 24 | Hirbat Sa'adim, (Khirbat Saida) | Judea | 31.75 | 35.13 | Katznelson M. K. |
| HUJINVPSE 548 | Cheliferidae | *Hysterochelifer cyprius* | 1 | 1971 | March | 25 | En Mata | Judea | 31.72 | 35.05 | Tsabar G. T. |
| HUJINVPSE 577 | Cheliferidae | *Hysterochelifer cyprius* | 9 | 2017 | June | 19 | Soreq Nature Reserve | Judea | 31.8 | 35.07 | Opiliones curse |
| HUJINVPSE 588 | Cheliferidae | *Hysterochelifer cyprius* | 9 | 2017 | June | 19 | Soreq Nature Reserve | Judea | 31.36 | 35.08 | Opiliones curse |
| HUJINVPSE 663 | Cheliferidae | *Hysterochelifer cyprius* | 1 | 2017 | June | 19 | Upper Soreq Nature Reserve | Judea | 31.76 | 35.07 |  |
| HUJINVPSE 406 | Cheliferidae | *Hysterochelifer cyprius* | 1 | 1972 | June | 2 | 5km S. of Mass'ada, Golan Heights | Golan | 33.23 | 35.75 | Tintpulver M. T. |
| HUJINVPSE 503 | Cheliferidae | *Hysterochelifer cyprius* | 1 | 1974 | July | 19 | Bab el-Hawa grove, Golan Heights | Golan Heights | 33.15 | 35.78 | Faunistics |
| HUJINVPSE 537 | Cheliferidae | *Hysterochelifer cyprius* | 2 | 1978 | July | 3 | Zivan | Golan | 33.11 | 35.79 | Levy G. L. |
| HUJINVPSE 579 | Cheliferidae | *Hysterochelifer cyprius* | 1 | 2017 | June | 12 | Odem forest | Golan | 33.23 | 35.75 | Opiliones curse |
| HUJINVPSE 37 | Cheliferidae | *Hysterochelifer cyprius* | 4 |  |  |  |  |  |  |  |  |
| HUJINVPSE 685 | Cheliferidae | *Hysterochelifer cyprius* | 1 |  |  |  |  |  |  |  | Steinitz H. S. |
| HUJINVPSE 768 | Cheliferidae | *Hysterochelifer distinguendus* | 1 | 2021 | November | 5 | Hazan Hills, Amatzia | Shfelat Yehudah | 31.52 | 34.91 | Pinchevsky D. |
| HUJINVPSE 769 | Cheliferidae | *Hysterochelifer distinguendus* | 3 | 2021 | September | 21 | Hazan Hills, Amatzia | Shfelat Yehudah | 31.52 | 34.91 | Pinchevsky D. |
| HUJINVPSE 772 | Cheliferidae | *Hysterochelifer distinguendus* | 1 | 2021 | September | 30 | Hazan Hills, Amatzia | Shfelat Yehudah | 31.52 | 34.91 | Pinchevsky D. |
| HUJINVPSE 773 | Cheliferidae | *Hysterochelifer distinguendus* | 1 | 2021 | September | 30 | Hazan Hills, Amatzia | Shfelat Yehudah | 31.52 | 34.91 | Pinchevsky D. |
| HUJINVPSE 781 | Cheliferidae | *Hysterochelifer distinguendus* | 1 | 2022 | January | 11 | Hazan Hills, Amatzia | Shfelat Yehudah | 31.52 | 34.91 | Pinchevsky D. |
| HUJINVPSE 843 | Cheliferidae | *Hysterochelifer distinguendus* | 1 | 2022 | March | 6 | Hazan Hills, Amatzia | Shfelat Yehudah | 31.52 | 34.91 | Pinchevsky D. |
| HUJINVPSE 844 | Cheliferidae | *Hysterochelifer distinguendus* | 3 | 2022 | May | 30 | Jerusalem Emek HaMazleva | Judea | 31.77 | 35.21 | Arachnid course |
| HUJINVPSE 695 | Cheliferidae | *Hysterochelifer tuberculatus* | 6 | 2018 | August | 24 | Beith Jan | Upper Galilee | 32.97 | 35.39 | Aharon S. |
| HUJINVPSE 929 | Cheliferidae | *Hysterochelifer tuberculatus* | 1 | 2022 | October | 22 | Snir | Galilee | 33.24 | 35.68 | Chipman A.D., Edgecomb G.D. |
| HUJINVPSE 860 | Cheliferidae | *Hysterochelifer tuberculatus* | 2 | 2022 | June | 22 | Einot Kishyon, Nahal Tavor | Lower Galilee | 32.71 | 35.1 | Shacham B. |
| HUJINVPSE 35 | Cheliferidae | *Hysterochelifer tuberculatus* | 3 | 1944 | December | 3 | Mishmar Ha'emek | Jezreel Valley | 32.61 | 35.14 | Shulov A. |
| HUJINVPSE 38 | Cheliferidae | *Hysterochelifer tuberculatus* | 1 | 1949 | December | 3 | Mishmar Ha'emek | Jezreel Valley | 32.61 | 35.14 | Shulov A. |
| HUJINVPSE 54 | Cheliferidae | *Hysterochelifer tuberculatus* | 1 | 1945 | February | 22 | Natania | Coastal plain- Center | 32.29 | 34.84 |  |
| HUJINVPSE 500 | Cheliferidae | *Hysterochelifer tuberculatus* | 1 | 1972 | February | 14 | Sidni Ali | Coastal plain- Center | 32.19 | 34.81 | Tsabar G. T. |
| HUJINVPSE 334 | Cheliferidae | *Hysterochelifer tuberculatus* | 1 | 1964 | November | 12 | Bet Gimal | Shfelat Yehudah | 31.72 | 34.98 | Levy G. L. |
| HUJINVPSE 675 | Cheliferidae | *Hysterochelifer tuberculatus* | 3 | 2002 | March | 22 | Adulam Reserve | Judea | 31.64 | 34.94 | Mandelik Y. M. |
| HUJINVPSE 722 | Cheliferidae | *Hysterochelifer tuberculatus* | 3 | 2020 | Feb | 16 | Haruva cave | Judea | 31.91 | 34.96 | EGR |
| HUJINVPSE 921 | Cheliferidae | *Hysterochelifer tuberculatus* | 5 | 2022 | August | 11 | Tel Sokho | Shfelat Yehudah | 31.68 | 34.97 | SK,EGR, BK, PPS, GG, HS |
| HUJINVPSE 927 | Cheliferidae | *Hysterochelifer tuberculatus* | 1 | 2022 | August | 16 | Nahal Socho | Shfelat Yehudah | 31.63 | 34.97 | EGR, PPS, GG |
| HUJINVPSE 59 | Cheliferidae | *Hysterochelifer tuberculatus* | 1 | 1937 | February | 18 | Jerusalem | Judea | 31.77 | 35.21 | Shulov A. |
| HUJINVPSE 359 | Cheliferidae | *Hysterochelifer tuberculatus* | 1 | 1938 | January | 15 | Jerusalem | Judea | 31.77 | 35.21 |  |
| HUJINVPSE 45 | Cheliferidae | *Hysterochelifer tuberculatus* | 1 | 1943 | November | 6 | Beth- Sekaria,Gus Ezion | Judea | 31.66 | 35.12 |  |
| HUJINVPSE 46 | Cheliferidae | *Hysterochelifer tuberculatus* | 1 | 1947 | April | 13 | Jerusalem | Judea | 31.77 | 35.21 | Shulov A. |
| HUJINVPSE 34 | Cheliferidae | *Hysterochelifer tuberculatus* | 1 | 1954 | December | 6 | Jerusalem | Judea | 31.77 | 35.21 |  |
| HUJINVPSE 39 | Cheliferidae | *Hysterochelifer tuberculatus* | 1 | 1954 | December | 6 | Jerusalem | Judea | 31.77 | 35.21 |  |
| HUJINVPSE 51 | Cheliferidae | *Hysterochelifer tuberculatus* | 1 | 1954 | July | 6 | Jerusalem | Judea | 31.77 | 35.21 |  |
| HUJINVPSE 53 | Cheliferidae | *Hysterochelifer tuberculatus* | 1 | 1954 | December | 15 | Jerusalem | Judea | 31.77 | 35.21 |  |
| HUJINVPSE 56 | Cheliferidae | *Hysterochelifer tuberculatus* | 1 | 1954 | December | 6 | Jerusalem | Judea | 31.77 | 35.21 |  |
| HUJINVPSE 40 | Cheliferidae | *Hysterochelifer tuberculatus* | 1 | 1961 | April | 22 | Hirbat Sa'adim, (Khirbat Saida) | Judea | 31.75 | 35.13 | Ackstein |
| HUJINVPSE 480 | Cheliferidae | *Hysterochelifer tuberculatus* | 1 | 1973 | May | 3 | Jerusalem | Judea | 31.77 | 35.21 | Tsabar G. T. |
| HUJINVPSE 590 | Cheliferidae | *Hysterochelifer tuberculatus* | 1 | 2017 | June | 19 | Hirbat Sa'adim | Judea | 31.75 | 35.13 | Opiliones curse |
| HUJINVPSE 749 | Cheliferidae | *Hysterochelifer tuberculatus* | 1 | 2022 | February | 27 | Jerusalem Givat Ram botanical gardens | Judea | 31.77 | 35.2 | D.Harms course |
| HUJINVPSE 750 | Cheliferidae | *Hysterochelifer tuberculatus* | 1 | 2022 | February | 27 | Jerusalem Givat Ram botanical gardens | Judea | 31.77 | 35.2 | D.Harms course |
| HUJINVPSE 758 | Cheliferidae | *Hysterochelifer tuberculatus* | 1 | 2022 | February | 27 | Jerusalem Givat Ram botanical gardens | Judea | 31.77 | 35.2 | D.Harms course |
| HUJINVPSE 761 | Cheliferidae | *Hysterochelifer tuberculatus* | 1 | 2022 | February | 27 | Jerusalem Givat Ram botanical gardens | Judea | 31.77 | 35.2 | D.Harms course |
| HUJINVPSE 762 | Cheliferidae | *Hysterochelifer tuberculatus* | 1 | 2022 | February | 27 | Jerusalem Givat Ram botanical gardens | Judea | 31.77 | 35.2 | D.Harms course |
| HUJINVPSE 766 | Cheliferidae | *Hysterochelifer tuberculatus* | 2 | 2022 | February | 26 | Jerusalem Givat Ram botanical gardens | Judea | 31.77 | 35.2 | D.Harms course |
| HUJINVPSE 811 | Cheliferidae | *Hysterochelifer tuberculatus* | 1 | 2022 | March | 28 | Jerusalem Givat Ram botanical gardens | Judea | 31.77 | 35.2 | EGR arachnid course |
| HUJINVPSE 812 | Cheliferidae | *Hysterochelifer tuberculatus* | 1 | 2022 | March | 28 | Jerusalem Givat Ram botanical gardens | Judea | 31.77 | 35.2 | EGR arachnid course |
| HUJINVPSE 751 | Cheliferidae | *Hysterochelifer tuberculatus* | 1 | 2022 | February | 27 | Jerusalem Givat Ram botanical gardens | Judea | 31.77 | 35.2 | D.Harms course |
| HUJINVPSE 894 | Cheliferidae | *Hysterochelifer* | 1 | 2022 | June | 30 | Mt. Meiron- Humema | Upper Galilee | 33.01 | 35.4 | M. Finkel , Y. Goren |
| HUJINVPSE 895 | Cheliferidae | *Hysterochelifer* | 1 | 2022 | June | 30 | Mt. Meiron- Humema | Upper Galilee | 33.01 | 35.4 | M. Finkel , Y. Goren |
| HUJINVPSE 57 | Cheliferidae | *Hysterochelifer* | 1 | 1938 | May |  | Jerusalem | Judea | 31.77 | 35.21 | Shulov A. |
| HUJINVPSE 867 | Cheliferidae | *Rachochelifer* | 1 | 2022 | May | 19 | Mt. Meiron- Humema | Upper Galilee | 33.01 | 35.4 | M. Finkel , Y. Goren |
| HUJINVPSE 883 | Cheliferidae | *Rachochelifer* | 1 | 2022 | May | 9 | Mt. Meiron- Humema | Upper Galilee | 33.01 | 35.4 | M. Finkel , Y. Goren |
| HUJINVPSE 899 | Cheliferidae | *Rachochelifer* | 1 | 2022 | June | 20 | Mt. Meiron- Hurfeish | Upper Galilee | 33.02 | 35.33 | M. Finkel , Y. Goren |
| HUJINVPSE 765 | Cheliferidae | *Rhacochelifer* | 1 | 2022 | March | 4 | Nahal Alexander | Emek Hefer | 32.39 | 34.89 | Ganem Z. |
| HUJINVPSE 297 | Cheliferidae | *Rhacochelifer* | 9 | 1962 | January | 10 | Wadi Rubin (Nahal Soreq) | Judea | 31.94 | 34.72 | Amitai P. A. |
| HUJINVPSE 771 | Cheliferidae | *Rhacochelifer* | 1 | 2021 | September | 30 | Hazan Hills, Amatzia | Shfelat Yehudah | 31.52 | 34.91 | Pinchevsky D. |
| HUJINVPSE 934 | Cheliferidae | *Rhacochelifer* | 1 | 2022 | October | 27 | Tel Sokho | Shfelat Yehudah | 31.68 | 34.97 | EGR, Daniel Alfred, Aharon S. |
| HUJINVPSE 58 | Cheliferidae | *Rhacochelifer* | 1 |  | September | 24 | Chanitah | Galilee - Upper Western | 33.09 | 35.17 |  |
| HUJINVPSE 704 | Cheliferidae | *Rhacochelifer corcyrensis bicolor* | 1 | 1944 | September | 8 | Atlit | Northern coastal Plain | 32.71 | 34.94 |  |
| HUJINVPSE 310 | Cheliferidae | *Rhacochelifer corcyrensis bicolor* | 1 | 1964 | May | 14 | Rosh HaNikra | Northern coastal Plain | 33.09 | 35.11 | Amitai P. A. |
| HUJINVPSE 891 | Cheliferidae | *Rhacochelifer corcyrensis bicolor* | 4 | 1967 | May | 8 | Hamadyia Jordan Valley | Jordan Valley | 32.53 | 35.54 | Costa M. C. |
| HUJINVPSE 487 | Cheliferidae | *Rhacochelifer corcyrensis bicolor* | 1 | 1978 | July | 2 | Bi'qat Btecha (N. Kinneret) | Galil | 32.88 | 35.64 | Levy G. L. |
| HUJINVPSE 485 | Cheliferidae | *Rhacochelifer corcyrensis bicolor* | 1 | 1979 | June | 24 | Bi'qat Btecha (N. Kinneret) | Galil | 32.88 | 35.64 | Levy G. L. |
| HUJINVPSE 385 | Cheliferidae | *Rhacochelifer corcyrensis bicolor* | 1 | 1939 | March | 8 | Avichail | Coastal plain- Center | 32.35 | 34.87 |  |
| HUJINVPSE 5 | Cheliferidae | *Rhacochelifer corcyrensis bicolor* | 1 | 1944 | March | 16 | Kfar Mallal | Coastal plain- Center | 32.17 | 34.89 | Moskona |
| HUJINVPSE 2 | Cheliferidae | *Rhacochelifer corcyrensis bicolor* | 1 | 1961 | May | 26 | Ashqelon, Hamama marshes | Coastal Plain - Southern | 31.67 | 34.55 | Ritte U. R. |
| HUJINVPSE 664 | Cheliferidae | *Rhacochelifer corcyrensis bicolor* | 1 | 2018 | February | 19 | TA university botanical gardens | central coastal plain | 32.11 | 34.81 |  |
| HUJINVPSE 600 | Cheliferidae | *Rhacochelifer corcyrensis bicolor* | 1 | 2021 | May | 22 | Yarkon | Coastal plain- Center | 32.1 | 34.79 | Sinaiko G. |
| HUJINVPSE 388 | Cheliferidae | *Rhacochelifer corcyrensis bicolor* | 1 |  | June |  | Jerusalem | Judea | 31.77 | 35.21 |  |
| HUJINVPSE 321 | Cheliferidae | *Rhacochelifer corcyrensis bicolor* | 1 | 1969 | May | 5 | En E'Tureba | Judea | 31.61 | 35.41 | Levy G. L. |
| HUJINVPSE 1 | Cheliferidae | *Rhacochelifer corcyrensis bicolor* | 1 | 1944 | March | 16 | Bet-HaArava, Near, Bank Of Jordan | Dead Sea | 31.8 | 35.5 |  |
| HUJINVPSE 8 | Cheliferidae | *Rhacochelifer corcyrensis bicolor* | 1 | 1944 | March | 16 | Bet-HaArava, Near, Bank Of Jordan | Dead Sea | 31.8 | 35.5 | Steinitz |
| HUJINVPSE 9 | Cheliferidae | *Rhacochelifer corcyrensis bicolor* | 1 | 1946 | March | 28 | Bet-HaArava, | Dead Sea | 31.8 | 35.5 | Shulov A. |
| HUJINVPSE 6 | Cheliferidae | *Rhacochelifer corcyrensis bicolor* | 1 | 1947 | August | 16 | En Gedi | Dead Sea | 31.47 | 35.39 | Wahrman J. |
| HUJINVPSE 7 | Cheliferidae | *Rhacochelifer corcyrensis bicolor* | 1 | 1961 | May | 6 | En Gedi | Dead Sea | 31.47 | 35.39 | Wahrman J. |
| HUJINVPSE 630 | Cheliferidae | *Rhacochelifer corcyrensis bicolor* | 1 | 2016 | 4Sep-5Oct |  | Avrona | Arava | 29.67 | 35.01 |  |
| HUJINVPSE 631 | Cheliferidae | *Rhacochelifer corcyrensis bicolor* | 3 | 2016 | 4Sep-5Oct |  | Avrona | Arava | 29.67 | 35.01 |  |
| HUJINVPSE 632 | Cheliferidae | *Rhacochelifer corcyrensis bicolor* | 1 | 2016 | 4Sep-5Oct |  | Avrona | Arava | 29.67 | 35.01 |  |
| HUJINVPSE 633 | Cheliferidae | *Rhacochelifer corcyrensis bicolor* | 1 | 2016 | 4Sep-5Oct |  | Avrona | Arava | 29.67 | 35.01 |  |
| HUJINVPSE 635 | Cheliferidae | *Rhacochelifer corcyrensis bicolor* | 1 | 2016 | 4Sep-5Oct |  | Avrona | Arava | 29.67 | 35.01 |  |
| HUJINVPSE 636 | Cheliferidae | *Rhacochelifer corcyrensis bicolor* | 1 | 2016 | 4Sep-5Oct |  | Avrona | Arava | 29.67 | 35.01 |  |
| HUJINVPSE 794 | Cheliferidae | *Rhacochelifer corcyrensis bicolor* | 3 | 2016 | May |  | Avrona | Arava | 29.67 | 35.01 | M. Ferrante |
| HUJINVPSE 797 | Cheliferidae | *Rhacochelifer corcyrensis bicolor* | 1 | 2016 | April | 19 | Avrona | Arava | 29.67 | 35.01 |  |
| HUJINVPSE 800 | Cheliferidae | *Rhacochelifer corcyrensis bicolor* | 1 | 2016 | May | 19 | Avrona | Arava | 29.67 | 35.01 |  |
| HUJINVPSE 803 | Cheliferidae | *Rhacochelifer corcyrensis bicolor* | 1 | 2016 | May | 19 | Avrona | Arava | 29.67 | 35.01 |  |
| HUJINVPSE 804 | Cheliferidae | *Rhacochelifer corcyrensis bicolor* | 1 | 2016 | May | 19 | Avrona | Arava | 29.67 | 35.01 |  |
| HUJINVPSE 615 | Cheliferidae | *Rhacochelifer corcyrensis bicolor* | 1 | 2017 | May |  | Avrona | Arava | 29.67 | 35.01 |  |
| HUJINVPSE 616 | Cheliferidae | *Rhacochelifer corcyrensis bicolor* | 1 | 2017 | September |  | Avrona | Arava | 29.67 | 35.01 |  |
| HUJINVPSE 620 | Cheliferidae | *Rhacochelifer corcyrensis bicolor* | 1 | 2017 | May |  | Avrona | Arava | 29.67 | 35.01 |  |
| HUJINVPSE 622 | Cheliferidae | *Rhacochelifer corcyrensis bicolor* | 2 | 2017 | May |  | Avrona | Arava | 29.67 | 35.01 |  |
| HUJINVPSE 624 | Cheliferidae | *Rhacochelifer corcyrensis bicolor* | 1 | 2017 | September |  | Avrona | Arava | 29.67 | 35.01 |  |
| HUJINVPSE 626 | Cheliferidae | *Rhacochelifer corcyrensis bicolor* | 1 | 2017 | May |  | Avrona | Arava | 29.67 | 35.01 |  |
| HUJINVPSE 627 | Cheliferidae | *Rhacochelifer corcyrensis bicolor* | 1 | 2017 | May |  | Avrona | Arava | 29.67 | 35.01 |  |
| HUJINVPSE 628 | Cheliferidae | *Rhacochelifer corcyrensis bicolor* | 1 | 2017 | May |  | Avrona | Arava | 29.67 | 35.01 |  |
| HUJINVPSE 637 | Cheliferidae | *Rhacochelifer corcyrensis bicolor* | 1 | 2017 | September |  | Avrona | Arava | 29.67 | 35.01 |  |
| HUJINVPSE 638 | Cheliferidae | *Rhacochelifer corcyrensis bicolor* | 1 | 2017 | September |  | Avrona | Arava | 29.67 | 35.01 |  |
| HUJINVPSE 639 | Cheliferidae | *Rhacochelifer corcyrensis bicolor* | 8 | 2017 | May |  | Avrona | Arava | 29.67 | 35.01 |  |
| HUJINVPSE 640 | Cheliferidae | *Rhacochelifer corcyrensis bicolor* | 1 | 2017 | May |  | Avrona | Arava | 29.67 | 35.01 |  |
| HUJINVPSE 641 | Cheliferidae | *Rhacochelifer corcyrensis bicolor* | 2 | 2017 | May |  | Avrona | Arava | 29.67 | 35.01 |  |
| HUJINVPSE 642 | Cheliferidae | *Rhacochelifer corcyrensis bicolor* | 3 | 2017 | May |  | Avrona | Arava | 29.67 | 35.01 |  |
| HUJINVPSE 643 | Cheliferidae | *Rhacochelifer corcyrensis bicolor* | 2 | 2017 | May |  | Avrona | Arava | 29.67 | 35.01 |  |
| HUJINVPSE 644 | Cheliferidae | *Rhacochelifer corcyrensis bicolor* | 2 | 2017 | September |  | Avrona | Arava | 29.67 | 35.01 |  |
| HUJINVPSE 646 | Cheliferidae | *Rhacochelifer corcyrensis bicolor* | 1 | 2017 | May |  | Avrona | Arava | 29.67 | 35.01 |  |
| HUJINVPSE 647 | Cheliferidae | *Rhacochelifer corcyrensis bicolor* | 1 | 2017 | May |  | Avrona | Arava | 29.67 | 35.01 |  |
| HUJINVPSE 648 | Cheliferidae | *Rhacochelifer corcyrensis bicolor* | 1 | 2017 | May |  | Avrona | Arava | 29.67 | 35.01 |  |
| HUJINVPSE 649 | Cheliferidae | *Rhacochelifer corcyrensis bicolor* | 2 | 2017 | May |  | Avrona | Arava | 29.67 | 35.01 |  |
| HUJINVPSE 667 | Cheliferidae | *Rhacochelifer corcyrensis bicolor* | 1 | 2017 | May |  | Avrona | Arava | 29.67 | 35.01 |  |
| HUJINVPSE 668 | Cheliferidae | *Rhacochelifer corcyrensis bicolor* | 1 | 2017 | May |  | Avrona | Arava | 29.67 | 35.01 |  |
| HUJINVPSE 799 | Cheliferidae | *Rhacochelifer corcyrensis bicolor* | 1 | 2017 | September |  | Avrona | Arava | 29.67 | 35.01 |  |
| HUJINVPSE 901 | Cheliferidae | *Rhacochelifer corcyrensis bicolor* | 2 | 2018 | September |  | Avrona | Arava | 29.67 | 35.01 |  |
| HUJINVPSE 902 | Cheliferidae | *Rhacochelifer corcyrensis bicolor* | 1 | 2018 | May |  | Avrona | Arava | 29.67 | 35.01 |  |
| HUJINVPSE 903 | Cheliferidae | *Rhacochelifer corcyrensis bicolor* | 11 | 2018 | September |  | Avrona | Arava | 29.67 | 35.01 |  |
| HUJINVPSE 904 | Cheliferidae | *Rhacochelifer corcyrensis bicolor* | 3 | 2018 | September |  | Avrona | Arava | 29.67 | 35.01 |  |
| HUJINVPSE 905 | Cheliferidae | *Rhacochelifer corcyrensis bicolor* | 1 | 2018 | May |  | Avrona | Arava | 29.67 | 35.01 |  |
| HUJINVPSE 906 | Cheliferidae | *Rhacochelifer corcyrensis bicolor* | 1 | 2018 | May |  | Avrona | Arava | 29.67 | 35.01 |  |
| HUJINVPSE 907 | Cheliferidae | *Rhacochelifer corcyrensis bicolor* | 1 | 2018 | May |  | Avrona | Arava | 29.67 | 35.01 |  |
| HUJINVPSE 908 | Cheliferidae | *Rhacochelifer corcyrensis bicolor* | 1 | 2018 | September |  | Avrona | Arava | 29.67 | 35.01 |  |
| HUJINVPSE 909 | Cheliferidae | *Rhacochelifer corcyrensis bicolor* | 3 | 2018 | September |  | Avrona | Arava | 29.67 | 35.01 |  |
| HUJINVPSE 910 | Cheliferidae | *Rhacochelifer corcyrensis bicolor* | 1 | 2018 | September |  | Avrona | Arava | 29.67 | 35.01 |  |
| HUJINVPSE 911 | Cheliferidae | *Rhacochelifer corcyrensis bicolor* | 1 | 2018 | September |  | Avrona | Arava | 29.67 | 35.01 |  |
| HUJINVPSE 912 | Cheliferidae | *Rhacochelifer corcyrensis bicolor* | 1 | 2018 | September |  | Avrona | Arava | 29.67 | 35.01 |  |
| HUJINVPSE 913 | Cheliferidae | *Rhacochelifer corcyrensis bicolor* | 1 | 2018 | September |  | Avrona | Arava | 29.67 | 35.01 |  |
| HUJINVPSE 914 | Cheliferidae | *Rhacochelifer corcyrensis bicolor* | 1 | 2018 | September |  | Avrona | Arava | 29.67 | 35.01 |  |
| HUJINVPSE 602 | Cheliferidae | *Rhacochelifer corcyrensis bicolor* | 1 | 2019 | Feb-March |  | Avrona | Arava | 29.67 | 35.01 | M. Ferrante |
| HUJINVPSE 603 | Cheliferidae | *Rhacochelifer corcyrensis bicolor* | 1 | 2019 | May-June |  | Avrona | Arava | 29.67 | 35.01 | M. Ferrante |
| HUJINVPSE 604 | Cheliferidae | *Rhacochelifer corcyrensis bicolor* | 1 | 2019 | May-June |  | Avrona | Arava | 29.67 | 35.01 | M. Ferrante |
| HUJINVPSE 605 | Cheliferidae | *Rhacochelifer corcyrensis bicolor* | 2 | 2019 | May-June |  | Avrona | Arava | 29.67 | 35.01 | M. Ferrante |
| HUJINVPSE 606 | Cheliferidae | *Rhacochelifer corcyrensis bicolor* | 2 | 2019 | May-June |  | Avrona | Arava | 29.67 | 35.01 | M. Ferrante |
| HUJINVPSE 607 | Cheliferidae | *Rhacochelifer corcyrensis bicolor* | 2 | 2019 | May-June |  | Avrona | Arava | 29.67 | 35.01 | M. Ferrante |
| HUJINVPSE 608 | Cheliferidae | *Rhacochelifer corcyrensis bicolor* | 1 | 2019 | Feb-March |  | Avrona | Arava | 29.67 | 35.01 | M. Ferrante |
| HUJINVPSE 609 | Cheliferidae | *Rhacochelifer corcyrensis bicolor* | 2 | 2019 | May-June |  | Avrona | Arava | 29.67 | 35.01 | M. Ferrante |
| HUJINVPSE 610 | Cheliferidae | *Rhacochelifer corcyrensis bicolor* | 3 | 2019 | May-June |  | Avrona | Arava | 29.67 | 35.01 | M. Ferrante |
| HUJINVPSE 611 | Cheliferidae | *Rhacochelifer corcyrensis bicolor* | 1 | 2019 | May-June |  | Avrona | Arava | 29.67 | 35.01 | M. Ferrante |
| HUJINVPSE 612 | Cheliferidae | *Rhacochelifer corcyrensis bicolor* | 1 | 2019 | Feb-March |  | Avrona | Arava | 29.67 | 35.01 | M. Ferrante |
| HUJINVPSE 613 | Cheliferidae | *Rhacochelifer corcyrensis bicolor* | 11 | 2019 | 3Jun-21Jul |  | Avrona | Arava | 29.67 | 35.01 | M. Ferrante |
| HUJINVPSE 614 | Cheliferidae | *Rhacochelifer corcyrensis bicolor* | 11 | 2019 | May-June |  | Avrona | Arava | 29.67 | 35.01 | M. Ferrante |
| HUJINVPSE 713 | Cheliferidae | *Rhacochelifer corcyrensis bicolor* | 3 | 2019 | Feb-March |  | Avrona | Arava | 29.67 | 35.01 | M. Ferrante |
| HUJINVPSE 714 | Cheliferidae | *Rhacochelifer corcyrensis bicolor* | 1 | 2019 | Feb-March |  | Avrona | Arava | 29.67 | 35.01 | M. Ferrante |
| HUJINVPSE 735 | Cheliferidae | *Rhacochelifer corcyrensis bicolor* | 1 | 2019 | Feb-March |  | Avrona | Arava | 29.67 | 35.01 | M. Ferrante |
| HUJINVPSE 736 | Cheliferidae | *Rhacochelifer corcyrensis bicolor* | 1 | 2019 | Feb-March |  | Avrona | Arava | 29.67 | 35.01 | M. Ferrante |
| HUJINVPSE 737 | Cheliferidae | *Rhacochelifer corcyrensis bicolor* | 1 | 2019 | Feb-March |  | Avrona | Arava | 29.67 | 35.01 | M. Ferrante |
| HUJINVPSE 798 | Cheliferidae | *Rhacochelifer corcyrensis bicolor* | 2 |  |  |  | Avrona | Arava | 29.67 | 35.01 |  |
| HUJINVPSE 801 | Cheliferidae | *Rhacochelifer corcyrensis bicolor* | 1 |  |  |  | Avrona | Arava | 29.67 | 35.01 |  |
| HUJINVPSE 805 | Cheliferidae | *Rhacochelifer corcyrensis bicolor* | 1 |  |  |  | Avrona | Arava | 29.67 | 35.01 |  |
| HUJINVPSE 465 | Cheliferidae | *Rhacochelifer corcyrensis bicolor* | 1 | 1969 | July | 15 | Paran plain near border with Egypt | Negev | 30.06 | 34.74 | Motka Avrahami |
| HUJINVPSE 302 | Cheliferidae | *Rhacochelifer corcyrensis bicolor* | 1 | 1939 | August | 14 | Wadi Arur |  |  |  |  |
| HUJINVPSE 617 | Cheliferidae | *Rhacochelifer corcyrensis bicolor* | 1 | 2017 | September | 12,13 | Avrona | Arava | 29.67 | 35.01 |  |
| HUJINVPSE 619 | Cheliferidae | *Rhacochelifer corcyrensis bicolor* | 1 | 2017 | September | 12,14 | Avrona | Arava | 29.67 | 35.01 |  |
| HUJINVPSE 623 | Cheliferidae | *Rhacochelifer corcyrensis bicolor* | 2 | 2017 | September | 11,12 | Avrona | Arava | 29.67 | 35.01 |  |
| HUJINVPSE 645 | Cheliferidae | *Rhacochelifer corcyrensis bicolor* | 1 | 2017 | May |  | Avrona | Arava | 29.67 | 35.01 |  |
| HUJINVPSE 52 | Cheliferidae | *Rhacochelifer* | 4 | 1940 | August | 18 | Hula | Galilee - Eastern Hula | 33.07 | 35.6 |  |
| HUJINVPSE 3 | Cheliferidae | *Rhacochelifer lobipes* | 1 | 1946 | April | 12 | Daphna | Galilee - Upper Eastern | 33.24 | 35.64 | Shulov A. |
| HUJINVPSE 543 | Cheliferidae | *Rhacochelifer longeunguiculatus* | 1 | 1961 | June | 19 | Meron | Galil | 32.99 | 35.41 | Wahrman J. W. |
| HUJINVPSE 236 | Cheliferidae | *Rhacochelifer longeunguiculatus* | 3 | 1944 | August | 27 | Bet Oren | Carmel | 32.73 | 35.01 | Steinitz H. S. |
| HUJINVPSE 257 | Cheliferidae | *Rhacochelifer longeunguiculatus* | 1 | 1961 | May | 14 | Rosh HaNikra | Northern coastal Plain | 33.09 | 35.12 | Amitai P. A. |
| HUJINVPSE 383 | Cheliferidae | *Rhacochelifer longeunguiculatus* | 1 | 1961 | May | 14 | Rosh Ha'nikra | Northern Coastal Plain | 33.09 | 35.12 | Amitai P. A. |
| HUJINVPSE 535 | Cheliferidae | *Rhacochelifer longeunguiculatus* | 1 | 1990 | January | 20 | Gan Sh'muel | Coastal plain- Center | 32.45 | 34.95 | Motro M. M. |
| HUJINVPSE 384 | Cheliferidae | *Rhacochelifer longeunguiculatus* | 3 | 1944 | May | 13 | Ben Shemen | Shfelat Yehudah | 31.96 | 34.92 |  |
| HUJINVPSE 437 | Cheliferidae | *Rhacochelifer longeunguiculatus* | 1 | 1992 | October | 3 | Ashqelon | Southern Coastal Plain | 31.67 | 34.55 | Motro M. M. |
| HUJINVPSE 946 | Cheliferidae | *Rhacochelifer longeunguiculatus* | 7 | 2018 | July | 19 | Haruva cave | Judea | 31.91 | 34.96 | Aharon S. |
| HUJINVPSE 742 | Cheliferidae | *Rhacochelifer longeunguiculatus* | 1 | 2022 | February | 23 | Adulam park | Judea | 31.64 | 34.94 | Samet G. |
| HUJINVPSE 367 | Cheliferidae | *Rhacochelifer longeunguiculatus* | 1 | 1938 | January | 15 | Jerusalem | Judea | 31.77 | 35.21 |  |
| HUJINVPSE 366 | Cheliferidae | *Rhacochelifer longeunguiculatus* | 1 | 1961 | May | 30 | Aqua Bella (En Hemed) | Judea | 31.8 | 35.13 | Shulov A. S. |
| HUJINVPSE 486 | Cheliferidae | *Rhacochelifer longeunguiculatus* | 1 | 1978 | May | 2 | Ramat Rahel | Judea | 31.74 | 35.22 | Levy G. L. |
| HUJINVPSE 689 | Cheliferidae | *Rhacochelifer longeunguiculatus* | 2 | 2018 | July | 30 | Kidod cave (near Arad) | Negev | 31.24 | 35.25 | Aharon S. |
| HUJINVPSE 693 | Cheliferidae | *Rhacochelifer longeunguiculatus* | 4 | 2018 | July | 30 | Kidod cave (near Arad) | Negev | 31.24 | 35.25 | Aharon S. |
| HUJINVPSE 725 | Cheliferidae | *Rhacochelifer longeunguiculatus* | 1 | 2018 | July | 30 | Kidod cave (near Arad) | Negev | 31.24 | 35.25 | Aharon S. |
| HUJINVPSE 369 | Cheliferidae | *Rhacochelifer longeunguiculatus* | 2 | 1934 | December | 15 | Kalia | Dead Sea | 31.73 | 35.49 |  |
| HUJINVPSE 755 | Cheliferidae | *Rhacochelifer longeunguiculatus* | 1 | 2022 | February | 17 | Nahal Pharan | Negev | 30.33 | 34.97 | Harms D., EGR, Warburg S. |
| HUJINVPSE 391 | Cheliferidae | *Rhacochelifer longeunguiculatus* | 2 | 1944 |  |  |  |  |  |  |  |
| HUJINVPSE 388 | Cheliferidae | *Rhacochelifer longeunguiculatus* | 1 | 1938 | December | 12 |  |  |  |  |  |
| HUJINVPSE 780 | Cheliferidae | *Rhacochelifer maculatus* | 1 | 2022 | January | 11 | Hazan Hills, Amatzia | Shfelat Yehudah | 31.52 | 34.91 | Pinchevsky D. |
| HUJINVPSE 292 | Cheliferidae | *Rhacochelifer peculiaris latissimus* | 1 |  |  |  | Jerusalem, En Karem | Judea | 31.77 | 35.16 | Amitai P. A. |
| HUJINVPSE 243 | Cheliferidae | *Rhacochelifer peculiaris latissimus* | 1 |  |  |  |  |  |  |  | Steinitz H. S. |
| HUJINVPSE 10 | Cheliferidae | *Rhacochelifer peculiaris peculiaris* | 1 | 1940 | April | 28 | Hula | Hula valley | 33.07 | 35.6 |  |
| HUJINVPSE 12 | Cheliferidae | *Rhacochelifer peculiaris peculiaris* | 1 | 1940 | April | 28 | Hula | Hula valley | 33.07 | 35.6 |  |
| HUJINVPSE 17 | Cheliferidae | *Rhacochelifer peculiaris peculiaris* | 1 | 1940 | April | 28 | Hula | Hula valley | 33.07 | 35.6 |  |
| HUJINVPSE 11 | Cheliferidae | *Rhacochelifer peculiaris peculiaris* | 1 | 1943 | November | 6 | Bet Aula | Judea | 31.6 | 35.03 |  |
| HUJINVPSE 13 | Cheliferidae | *Rhacochelifer peculiaris peculiaris* | 1 | 1944 | March | 3 | Nahal Revida (=Wadi Ruwas) | Judea | 31.78 | 35.17 |  |
| HUJINVPSE 15 | Cheliferidae | *Rhacochelifer peculiaris peculiaris* | 1 | 1944 | April | 1 | near En Karem | Judea | 31.77 | 35.16 | Moskona |
| HUJINVPSE 18 | Cheliferidae | *Rhacochelifer peculiaris peculiaris* | 1 | 1944 | March | 6 | Bittir | Judea | 31.73 | 35.14 |  |
| HUJINVPSE 16 | Cheliferidae | *Rhacochelifer peculiaris peculiaris* | 1 | 1961 | April | 28 | Jerusalem | Judea | 31.77 | 35.21 | Wahrman J. W. |
| HUJINVPSE 14 | Cheliferidae | *Rhacochelifer peculiaris peculiaris* | 1 | 1947 | March | 20 | Nahal Timna | Arava | 29.81 | 35 | Shulov A. |
| HUJINVPSE 837 | Cheliferidae | *Rhacochelifer* | 1 | 2022 | May | 2 | Tel Sokho | Shfelat Yehudah | 31.68 | 34.97 | Aharon S. |
| HUJINVPSE 922 | Cheliferidae | *Rhacochelifer* | 6 | 2022 | August | 11 | Tel Sokho | Shfelat Yehudah | 31.68 | 34.97 | EGR, PPS, GG |
| HUJINVPSE 790 | Cheliferidae |  | 1 | 2014 | March | 13 | Yonim cave, Har Gamal | Western Galilee | 32.92 | 35.22 | Aharon S., EGR |
| HUJINVPSE 732 | Cheliferidae |  | 1 | 2018 | July | 25 | Tefen cave |  | 32.97 | 35.28 | Aharon S. |
| HUJINVPSE 733 | Cheliferidae |  | 1 | 2018 | July | 18 | Manot cave | Galilee | 32.77 | 35.65 | Aharon S. |
| HUJINVPSE 269 | Cheliferidae |  | 1 | 1945 | April | 23 | Jenin | Samaria | 32.45 | 35.31 | Steinitz H. S. |
| HUJINVPSE 401 | Cheliferidae |  | 1 | 1938 | February | 15 |  |  |  |  | Paz M. J. |
| HUJINVPSE 545 | Chernetidae | *Allochernes masi* | 5 | 1975 | January | 21 | Ma'agan Mikhael | Northern Coastal Plain | 32.55 | 34.91 | Costa M. C. |
| HUJINVPSE 85 | Chernetidae | *Allochernes masi* | 1 | 1960 | October | 10 | Bet Guvrin, Iraq el Mai | Shfelat Yehudah | 31.59 | 34.9 | Wahrman J. W. |
| HUJINVPSE 88 | Chernetidae | *Allochernes masi* | 1 | 1960 | October | 10 | Bet Guvrin, Iraq el Mai | Shfelat Yehudah | 31.59 | 34.9 | Wahrman J. W. |
| HUJINVPSE 320 | Chernetidae | *Allochernes masi* | 1 | 1961 | August | 30 | Bet Govrin caves | Shfelat Yehudah | 31.59 | 34.9 | Pener |
| HUJINVPSE 888 | Chernetidae | *Allochernes masi* | 2 | 2022 | May | 16 | Yir'on cave | Galilee | 33.07 | 35.46 | Aharon S., Warburg S. |
| HUJINVPSE 721 | Chernetidae | *Chernes rhodinus* | 20 | 2018 | August | 20 | Sefunim cave | Carmel | 32.74 | 34.98 | Aharon S. |
| HUJINVPSE 793 | Chernetidae | *Chernes rhodinus* | 1 | 2018 | August | 20 | Sefunim cave | Carmel | 32.74 | 34.98 | Aharon S., EGR, JB, GG |
| HUJINVPSE 718 | Chernetidae | *Chernes rhodinus* | 1 | 2014 | May | 2 | Beit Arif cave | Shfelat Yehudah | 31.99 | 34.96 | Aharon S. |
| HUJINVPSE 691 | Chernetidae | *Chernes* | 1 | 2018 | August | 20 | Ornit cave | Carmel | 32.76 | 34.99 | Aharon S. |
| HUJINVPSE 69 | Chernetidae | *Lamprochernes nodosus* | 1 | 1947 | September |  | Jerusalem | Judea | 31.77 | 35.21 | Theodor |
| HUJINVPSE 72 | Chernetidae | *Lamprochernes nodosus* | 1 | 1947 | September |  | Jerusalem | Judea | 31.77 | 35.21 | Theodor |
| HUJINVPSE 70 | Chernetidae | *Lamprochernes nodosus* | 1 | 1948 | July | 7 | Jerusalem | Judea | 31.77 | 35.21 | Theodor |
| HUJINVPSE 466 | Chernetidae | *Lamprochernes savignyi* | 12 | 1964 | June | 9 | Tivon | Jezreel valley | 32.72 | 35.12 | Beyerauo Y. |
| HUJINVPSE 491 | Chernetidae | *Lamprochernes savignyi* | 9 | 1966 | May | 26 | Mishmar Ha'emek | Jezreel Valley | 32.61 | 35.14 | Costa M. C. |
| HUJINVPSE 525 | Chernetidae | *Lamprochernes savignyi* | 11 | 1966 | June | 5 | Mishmar Ha'emek | Jezreel Valley | 32.61 | 35.14 | Costa M. C. |
| HUJINVPSE 531 | Chernetidae | *Lamprochernes savignyi* | 12 | 1966 | September | 12 | Mishmar Ha'emek | Jezreel Valley | 32.61 | 35.14 | Costa M. C. |
| HUJINVPSE 546 | Chernetidae | *Lamprochernes savignyi* | 34 | 1967 | March | 1 | Mishmar Ha'emek | Jezreel Valley | 32.61 | 35.14 | Costa M. C. |
| HUJINVPSE 68 | Chernetidae | *Lamprochernes savignyi* | 1 | 1961 | June | 3 | Kinneret | Galil | 32.89 | 35.58 | Katznelson |
| HUJINVPSE 295 | Chernetidae | *Lamprochernes savignyi* | 1 | 1961 | November | 5 | Kfar Haro'e | Coastal plain- Center | 32.39 | 34.91 | Weltsch Y. W. |
| HUJINVPSE 444 | Chernetidae | *Lamprochernes savignyi* | 6 | 1967 | October | 25 | Nof Yam | Coastal plain- Center | 32.19 | 34.81 | Ofer J. O. |
| HUJINVPSE 450 | Chernetidae | *Lamprochernes savignyi* | 1 | 1971 | August | 8 | Beror Hayil | Southern Coastal Plain | 31.56 | 34.64 | Tsoran Y. T. |
| HUJINVPSE 314 | Chernetidae | *Lamprochernes savignyi* | 1 | 1961 | June | 4 | Jerusalem | Judea | 31.77 | 35.21 | Margalith J. M. |
| HUJINVPSE 671 | Chernetidae | *Lamprochernes savignyi* | 2 | 2018 | March | 26 | Jerusalem | Judea | 31.77 | 35.21 |  |
| HUJINVPSE 672 | Chernetidae | *Lamprochernes savignyi* | 1 | 2018 | March | 26 | Jerusalem | Judea | 31.77 | 35.21 |  |
| HUJINVPSE 576 | Chernetidae | *Lamprochernes savignyi* | 1 | 1975 | June | 16 | Hurshat Mansura | Galilee/Golan | 32.97 | 35.62 | Faunistics |
| HUJINVPSE 71 | Chernetidae | *Lamprochernes savignyi* | 1 |  |  |  |  |  |  |  |  |
| HUJINVPSE 462 | Chernetidae | *Lasiochernes turcicus* | 1 | 1954 | June | 25 | Nahal Keren | Western Galilee Kziv | 33.04 | 35.27 | Costa M. |
| HUJINVPSE 715 | Chernetidae | *Lasiochernes turcicus* | 1 | 2015 | July | 30 | Manot cave | Galilee | 32.77 | 35.65 | Kremer E., knnyot D. |
| HUJINVPSE 717 | Chernetidae | *Lasiochernes turcicus* | 1 | 2015 | July | 30 | Manot cave | Galilee | 32.77 | 35.65 | Aharon S. Boaz L. |
| HUJINVPSE 724 | Chernetidae | *Lasiochernes turcicus* | 5 | 2018 | July | 18 | Manot cave | Galilee | 32.77 | 35.65 | Aharon S. |
| HUJINVPSE 727 | Chernetidae | *Lasiochernes turcicus* | 1 | 2018 | July | 25 | Tefen cave |  | 32.97 | 35.28 | Aharon S. |
| HUJINVPSE 86 | Chernetidae | *Lasiochernes turcicus* | 1 | 1954 | February | 3 | Aqua Bella (En Hemed) | Judea | 31.8 | 35.13 | Theodor |
| HUJINVPSE 89 | Chernetidae | *Lasiochernes turcicus* | 1 | 1954 | March | 8 | Aqua Bella (En Hemed) | Judea | 31.8 | 35.13 |  |
| HUJINVPSE 87 | Chernetidae | *Lasiochernes turcicus* | 1 | 1959 | November | 14 | Hirbat Sa'adim (Hirbet Qaryet Saide) | Judea | 31.75 | 35.13 | Wahrman J. W. & Ritte U. |
| HUJINVPSE 90 | Chernetidae | *Lasiochernes turcicus* | 1 | 1961 | February | 10 | Bet Meir (Hamasrek) | Judea | 31.79 | 35.04 | Wahrman J. W. |
| HUJINVPSE 78 | Chernetidae | *Nudochernes spalacis* | 1 | 1968 | February | 13 | Sa'ar | Galil | 33.03 | 35.11 | Costa M. |
| HUJINVPSE 74 | Chernetidae | *Nudochernes spalacis* | 1 | 1968 | March | 2 | Nablus | Samaria | 32.23 | 35.26 | Costa M. |
| HUJINVPSE 79 | Chernetidae | *Nudochernes spalacis* | 1 | 1954 | March | 3 | Lod (Lydda) | Shfelat Yehudah | 31.96 | 34.88 |  |
| HUJINVPSE 84 | Chernetidae | *Nudochernes spalacis* | 1 | 1954 | March | 3 | Lod (Lydda) | Shfelat Yehudah | 31.96 | 34.88 |  |
| HUJINVPSE 83 | Chernetidae | *Nudochernes spalacis* | 1 | 1968 | March | 26 | South of Gaza | Southern Coastal Plain | 31.48 | 34.42 | Costa M. |
| HUJINVPSE 76 | Chernetidae | *Nudochernes spalacis* | 1 | 1968 | February | 23 | Emek Ayyalon | Shfelat Yehudah | 31.84 | 35.01 | Costa M. |
| HUJINVPSE 80 | Chernetidae | *Nudochernes spalacis* | 1 | 1954 | February | 20 | Jerusalem | Judea | 31.77 | 35.21 |  |
| HUJINVPSE 82 | Chernetidae | *Nudochernes spalacis* | 1 | 1954 | March | 22 | Jerusalem | Judea | 31.77 | 35.21 | Wahrman J. W. |
| HUJINVPSE 449 | Chernetidae | *Nudochernes spalacis* | 38 | 1964 | February | 20 | Jerusalem | Judea | 31.77 | 35.21 | Costa M. C. |
| HUJINVPSE 477 | Chernetidae | *Nudochernes spalacis* | 12 | 1966 | February | 12 | Jerusalem | Judea | 31.77 | 35.21 | Katznelson |
| HUJINVPSE 73 | Chernetidae | *Nudochernes spalacis* | 1 | 1968 | March | 5 | Gush Ezion | Judea | 31.66 | 35.12 | Costa M. |
| HUJINVPSE 77 | Chernetidae | *Nudochernes spalacis* | 1 | 1968 | February | 15 | Jerusalem | Judea | 31.77 | 35.21 | Costa M. |
| HUJINVPSE 81 | Chernetidae | *Nudochernes spalacis* | 1 | 1968 | March | 8 | Vicinity of Hebron | Judea | 31.5 | 35.13 | Costa M. |
| HUJINVPSE 458 | Chernetidae | *Nudochernes spalacis* | 21 | 1968 | February | 12 | Jerusalem | Judea | 31.77 | 35.21 | Costa M. C. |
| HUJINVPSE 75 | Chernetidae | *Nudochernes spalacis* | 1 | 1968 | March | 26 | Yeruham | Negev | 30.99 | 34.91 | Costa M. |
| HUJINVPSE 452 | Chernetidae | *Nudochernes spalacis* | 1 | 1968 | April | 9 | Mt. Hermon, 2200m | Hermon | 33.32 | 35.79 | Nevo E. N. & Costa M. |
| HUJINVPSE 472 | Chernetidae | *Nudochernes spalacis* | 17 | 1968 | April | 9 | Mt. Hermon, 2200m | Hermon | 33.32 | 35.79 | Nevo E. N. & Costa M. |
| HUJINVPSE 828 | Chernetidae |  | 1 | 2021 | August | 18 | Shfanim cave | Upper Galilee | 32.96 | 35.39 | Ganem Z. M. |
| HUJINVPSE 846 | Chernetidae |  | 1 | 2022 | May | 16 | Seter cave near Ein Koves/ Nahal Amud | Eastern Upper Galilee | 32.94 | 35.48 | Aharon S. |
| HUJINVPSE 821 | Chernetidae |  | 1 | 2021 | August | 16 | Sefunim cave | Carmel | 32.74 | 34.98 | Ganem Z. M. |
| HUJINVPSE 822 | Chernetidae |  | 1 | 2021 | August | 16 | Sefunim cave | Carmel | 32.74 | 34.98 | Ganem Z. M. |
| HUJINVPSE 823 | Chernetidae |  | 1 | 2021 | August | 16 | Sefunim cave | Carmel | 32.74 | 34.98 | Ganem Z. M. |
| HUJINVPSE 824 | Chernetidae |  | 3 | 2021 | August | 16 | Sefunim cave | Carmel | 32.74 | 34.98 | Ganem Z. M. |
| HUJINVPSE 825 | Chernetidae |  | 6 | 2021 | August | 16 | Sefunim cave | Carmel | 32.74 | 34.98 | Ganem Z. M. |
| HUJINVPSE 826 | Chernetidae |  | 5 | 2021 | August | 16 | Sefunim cave | Carmel | 32.74 | 34.98 | Ganem Z. M. |
| HUJINVPSE 827 | Chernetidae |  | 12 | 2021 | August | 16 | Sefunim cave | Carmel | 32.74 | 34.98 | Ganem Z. M. |
| HUJINVPSE 442 | Chernetidae |  | 2 | 1967 | September | 29 | Nahsholim | Carmel | 32.61 | 34.92 | Costa M. C. |
| HUJINVPSE 679 | Chernetidae |  | 1 | 1968 | March | 4 | Nahal Sha'ar | Samaria | 32.12 | 35.06 | Costa M. C. |
| HUJINVPSE 816 | Chernetidae |  | 1 | 2021 | September | 8 | Tinshemet cave | Shfelat Yehudah | 32 | 34.96 | Ganem Z. M. |
| HUJINVPSE 817 | Chernetidae |  | 1 | 2021 | September | 8 | Tinshemet cave | Shfelat Yehudah | 32 | 34.96 | Ganem Z. M. |
| HUJINVPSE 818 | Chernetidae |  | 1 | 2021 | September | 8 | Tinshemet cave | Shfelat Yehudah | 32 | 34.96 | Ganem Z. M. |
| HUJINVPSE 819 | Chernetidae |  | 1 | 2021 | September | 8 | Tinshemet cave | Shfelat Yehudah | 32 | 34.96 | Ganem Z. M. |
| HUJINVPSE 820 | Chernetidae |  | 1 | 2021 | September | 8 | Tinshemet cave | Shfelat Yehudah | 32 | 34.96 | Ganem Z. M. |
| HUJINVPSE 698 | Chernetidae |  | 1 | 2021 | September | 12 | Teomim cave | Judea | 31.73 | 35.02 | Ganem Z. M. |
| HUJINVPSE 836 | Chernetidae |  | 1 | 2022 | April | 28 | Sdeh Boqer Ben Gurion Midrasha | Negev mt. | 30.85 | 34.78 | EGR |
| HUJINVPSE 720 | Chthoniidae | *Ephippiochtonius* | 1 | 2021 | May | 26 | Ornit cave | Carmel | 32.76 | 34.99 | Aharon S. |
| HUJINVPSE 791 | Chthoniidae | *Ephippiochtonius* | 1 | 2021 | August | 19 | Ornit cave | Carmel | 32.76 | 34.99 | Aharon S. |
| HUJINVPSE 918 | Chthoniidae | *Ephippiochtonius* | 1 | 2022 | August | 10 | Ornit cave | Carmel | 32.76 | 34.99 | Ganem Z. M. |
| HUJINVPSE 920 | Chthoniidae | *Ephippiochtonius* | 10 | 2022 | August | 10 | Ornit cave | Carmel | 32.76 | 34.99 | BK, PPS, GG, HS, SW, |
| HUJINVPSE 919 | Chthoniidae | *Ephippiochtonius* | 2 | 2022 | August | 10 | Ornit cave | Carmel | 32.76 | 34.99 | BK, PPS, GG, HS |
| HUJINVPSE 851 | Chthoniidae | *Ayyalonia dimentmani* | 5 | 2006 | July |  | Ayyalon cave | Shfelat Yehudah | 31.91 | 34.93 | Dimmentman H. |
| HUJINVPSE 93 | Chthoniidae | *Ayyalonia dimentmani* | 4 | 2008 | December | 12 | Ayyalon cave | Shfelat Yehudah | 31.91 | 34.93 | Naaman I. |
| HUJINVPSE 743 | Chthoniidae | *Ayyalonya* | 1 | 2021 | August |  | Yir'on cave |  | 33.07 | 35.46 | Aharon S. |
| HUJINVPSE 890 | Chthoniidae | *Ayyalonya* | 4 | 2022 | May | 16 | Yir'on cave | Galilee | 33.07 | 35.46 | Aharon S., Warburg S. |
| HUJINVPSE 847 | Chthoniidae | *Ephippiochtonius* | 1 | 2022 | May | 16 | Seter cave near Ein Koves/ Nahal Amud | Eastern Upper Galilee | 32.94 | 35.48 | Aharon S. |
| HUJINVPSE 728 | Chthoniidae | *Ephippiochtonius* | 1 | 2018 | August | 20 | Ornit cave | Carmel | 32.76 | 34.99 | Aharon S. |
| HUJINVPSE 745 | Chthoniidae | *Ephippiochtonius* | 3 |  |  |  | Arak Na'asane cave (Wadi Dalia) | Judean Desert | 31.99 | 35.41 |  |
| HUJINVPSE 287 | Chthoniidae | *Chthonius* | 1 | 1996 | July |  | Bar'am Forest | Galilee | 33.04 | 35.42 | Sharon R. |
| HUJINVPSE 785 | Chthoniidae | *Ephippiochthonius* | 1 | 2021 | August | 16 | Serach cave | Western Upper Galilee | 33.07 | 35.24 | Aharon S. |
| HUJINVPSE 849 | Chthoniidae | *Ephippiochthonius* | 1 | 2022 | May | 17 | Namer cave | Western Upper Galilee | 33.08 | 35.2 | Aharon S. |
| HUJINVPSE 744 | Chthoniidae | *Ephippiochthonius* | 1 |  |  |  | Serach cave |  | 33.07 | 35.24 |  |
| HUJINVPSE 280 | Chthoniidae | *Ephippiochthonius* | 2 | 1943 | April | 24 | N. Revida Sela Ha'pil (Jerusalem Forest) | Judea | 31.78 | 35.17 | Steinitz H. S. |
| HUJINVPSE 845 | Chthoniidae | *Ephippiochthonius* | 1 | 2022 | May | 16 | Serach cave | Western Upper Galilee | 33.07 | 35.24 | Aharon S. |
| HUJINVPSE 850 | Chthoniidae | *Ephippiochthonius* | 3 | 2022 | May | 17 | Irav cave near Arab-el-Aramshe | Western Upper Galilee | 33.08 | 35.23 | Warburg S. |
| HUJINVPSE 298 | Chthoniidae | *Ephippiochthonius* | 1 | 1961 | May | 13 | Gachule ('En Teo) | Galilee | 33.1 | 35.61 | Amitai P. A. |
| HUJINVPSE 341 | Chthoniidae | *Ephippiochthonius* | 1 | 1961 | May | 13 | Gachule ('En Teo) | Galilee | 33.1 | 35.61 | Amitai P. A. |
| HUJINVPSE 719 | Chthoniidae | *Ephippiochthonius* | 1 | 2014 | March | 12 | Yir'on cave | Galilee | 33.07 | 35.46 | Aharon S. |
| HUJINVPSE 580 | Chthoniidae | *Ephippiochthonius* | 1 | 2017 | June | 11 | Tel Dan Reserve | Galilee | 33.25 | 35.65 | Opiliones curse |
| HUJINVPSE 889 | Chthoniidae | *Ephippiochthonius* | 1 | 2022 | May | 16 | Yir'on cave | Galilee | 33.07 | 35.46 | Aharon S., Warburg S. |
| HUJINVPSE 716 | Chthoniidae | *Ephippiochthonius* | 1 | 2014 | March | 13 | Hurbat Raqqit | Carmel | 32.71 | 35.02 | Aharon S. |
| HUJINVPSE 241 | Chthoniidae | *Ephippiochthonius* | 1 | 1974 | February | 27 | En Arik | Judea/Samaria | 31.91 | 35.14 | Tsabar G. T. |
| HUJINVPSE 778 | Chthoniidae | *Ephippiochthonius* | 1 | 2022 | January | 11 | Hazan Hills, Amatzia | Shfelat Yehudah | 31.52 | 34.91 | Pinchevsky D. |
| HUJINVPSE 779 | Chthoniidae | *Ephippiochthonius* | 1 | 2022 | January | 11 | Hazan Hills, Amatzia | Shfelat Yehudah | 31.52 | 34.91 | Pinchevsky D. |
| HUJINVPSE 783 | Chthoniidae | *Ephippiochthonius* | 1 | 2022 | January | 11 | Hazan Hills, Amatzia | Shfelat Yehudah | 31.52 | 34.91 | Pinchevsky D. |
| HUJINVPSE 740 | Chthoniidae | *Ephippiochthonius sacer* | 1 | 1965 | December | 23 | Nahal Amud | Galilee | 32.97 | 35.47 | Costa M. C. |
| HUJINVPSE 776 | Chthoniidae | *Ephippiochthonius sacer* | 1 | 2022 | January | 11 | Hazan Hills, Amatzia | Shfelat Yehudah | 31.52 | 34.91 | Pinchevsky D. |
| HUJINVPSE 92 | Chthoniidae | *Ephippiochthonius sacer* | 1 | 1943 | January | 9 | Jerusalem, Ge-Hinnom | Judea | 31.77 | 35.23 |  |
| HUJINVPSE 242 | Chthoniidae | *Ephippiochthonius sacer* | 5 | 1943 | February | 16 | Jerusalem, Ge-Hinnom | Judea | 31.77 | 35.23 | Steinitz H. S. |
| HUJINVPSE 885 | Chthoniidae | *Ephippiochthonius tetrachelatus* | 1 | 2022 | May | 1 | Mt. Meiron- Afa'im | Upper Galilee | 32.99 | 35.41 | M. Finkel , Y. Goren |
| HUJINVPSE 931 | Chthoniidae | *Ephippiochtonius* | 3 | 2007 | May | 18 | Sha'at cave (near Karnei Shomron) | West Samariah | 32.17 | 35.1 | Israel Naaman |
| HUJINVPSE 741 | Chthoniidae | *Ephippiochtonius* | 1 | 1965 | December | 23 | Nahal Amud | Galilee | 32.98 | 35.47 | Costa M. C. |
| HUJINVPSE 91 | Chthoniidae | *Ephippiochtonius tetrachelatus* | 1 | 1944 | March |  | N. Revida Sela Ha'pil (Jerusalem Forest) | Judea | 31.78 | 35.17 |  |
| HUJINVPSE 943 | Chthoniidae | *Ephippiochthonius* | 1 | 2023 | January | 19 | Sussita cave | Golan | 32.78 | 35.66 | Pavlek M. |
| HUJINVPSE 944 | Chthoniidae | *Ephippiochthonius* | 2 | 2023 | January | 19 | Sussita cave | Golan | 32.78 | 35.66 | Ganem Z. M. , Aharon S. |
| HUJINVPSE 688 | Chthoniidae | *Ephippiochthonius* | 1 | 2021 | September | 12 | Teomim cave | Judea | 31.73 | 35.02 | E. Gavish Regev et al. |
| HUJINVPSE 700 | Chthoniidae | *Ephippiochthonius* | 1 | 2021 | September | 12 | Teomim cave | Judea | 31.73 | 35.02 | Ganem Z. M. |
| HUJINVPSE 786 | Chthoniidae | *Ephippiochthonius* | 1 | 2021 | September | 12 | Teomim cave | Judea | 31.73 | 35.02 | E. Gavish Regev et al. Yuval Z. |
| HUJINVPSE 789 | Chthoniidae | *Ephippiochthonius* | 1 | 2021 | September? | 12 | Teomim cave | Judea | 31.73 | 35.02 | Aharon S. |
| HUJINVPSE 829 | Chthoniidae | *Ephippiochthonius* | 1 | 2021 | September | 12 | Teomim cave | Judea | 31.73 | 35.02 | Ganem Z. M. |
| HUJINVPSE 830 | Chthoniidae | *Ephippiochthonius* | 1 | 2021 | September | 12 | Teomim cave | Judea | 31.73 | 35.02 | Ganem Z. M. |
| HUJINVPSE 916 | Chthoniidae | *Ephippiochthonius* | 1 | 2022 | August | 7 | Teomim cave | Judea | 31.73 | 35.02 | Gainett G. |
| HUJINVPSE 939 | Chthoniidae | *Ephippiochthonius* | 2 | 2023 | January | 12 | Teomim cave | Judea | 31.73 | 35.02 | Aharon S. |
| HUJINVPSE 936 | Chthoniidae | *Ephippiochthonius* | 3 | 2023 | January | 12 | Teomim cave | Judea | 31.73 | 35.02 | Pavlek M. |
| HUJINVPSE 938 | Chthoniidae | *Ephippiochthonius* | 3 | 2023 | January | 12 | Teomim cave | Judea | 31.73 | 35.02 | Warburg S. |
| HUJINVPSE 937 | Chthoniidae | *Ephippiochthonius* | 2 | 2023 | January | 12 | Teomim cave | Judea | 31.73 | 35.02 | Pavlek M. |
| HUJINVPSE 696 | Chthoniidae | *Ephippiochthonius* | 1 | 2021 | August | 19 | Ornit cave | Carmel | 32.76 | 34.99 | Ganem Z. M. |
| HUJINVPSE 697 | Chthoniidae | *Ephippiochthonius* | 1 | 2021 | August | 19 | Ornit cave | Carmel | 32.76 | 34.99 | Ganem Z. M. |
| HUJINVPSE 787 | Chthoniidae | *Ephippiochthonius* | 1 | 2021 | August | 19 | Ornit cave | Carmel | 32.76 | 34.99 | Aharon S. |
| HUJINVPSE 940 | Chthoniidae | *Ephippiochthonius* | 2 | 2023 | January | 18 | Ornit cave | Carmel | 32.76 | 34.99 | Aharon S. |
| HUJINVPSE 941 | Chthoniidae | *Ephippiochthonius* | 4 | 2023 | January | 18 | Ornit cave | Carmel | 32.76 | 34.99 | Pavlek M. |
| HUJINVPSE 942 | Chthoniidae | *Ephippiochthonius* | 3 | 2023 | January | 18 | Ornit cave | Carmel | 32.76 | 34.99 | Pavlek M. |
| HUJINVPSE 108 | Garypidae | *Garypus beauvoisi* | 2 | 1940 | May | 26 | Atlit | Carmel coast | 32.71 | 34.94 |  |
| HUJINVPSE 109 | Garypidae | *Garypus beauvoisi* | 2 | 1940 | March | 23 | Bat Galim, Haifa | Carmel coast | 32.84 | 34.98 | Shulov A. |
| HUJINVPSE 394 | Garypidae | *Garypus beauvoisi* | 4 | 1940 | March | 23 | Bat Galim, Haifa | Carmel coast | 32.84 | 34.98 |  |
| HUJINVPSE 457 | Garypidae | *Garypus beauvoisi* | 8 | 1967 | September | 20 | Nahsholim | Carmel coast | 32.61 | 34.92 | Costa M. C. |
| HUJINVPSE 513 | Garypidae | *Garypus beauvoisi* | 5 | 1971 | July | 20 | Shave Ziyyon | Galil coast | 32.98 | 35.08 | Costa M. C. |
| HUJINVPSE 536 | Garypidae | *Garypus beauvoisi* | 5 | 1971 | July | 27 | Nahsholim | Carmel coast | 32.61 | 34.92 | Costa M. C. |
| HUJINVPSE 110 | Garypidae | *Garypus levantinus* | 1 | 1961 | June | 5 | Mikhmoret | Coastal plain- Center | 32.41 | 34.87 | Safriel U. |
| HUJINVPSE 521 | Garypidae | *Garypus levantinus* | 3 | 1965 | June | 17 | Tantura (Dor) sea shore | Carmel coast | 32.58 | 34.91 | Costa M. C. |
| HUJINVPSE 489 | Garypidae | *Garypus levantinus* | 1 | 1969 | June | 18 | Nahsholim | Carmel coast | 32.61 | 34.92 | Sandler H. S. |
| HUJINVPSE 447 | Garypidae | *Garypus levantinus* | 1 | 1964 | May | 6 | Mikhmoret | Coastal plain- Center | 32.41 | 34.87 | Safriel U. |
| HUJINVPSE 948 | Garypinidae | *Garypinus* | 1 | 2018 | August | 25 | Marva cave (near Meona) | Galilee | 33.02 | 35.24 | Aharon S. |
| HUJINVPSE 848 | Garypinidae | *Garypinus* | 3 | 2022 | May | 16 | Seter cave near Ein Koves/ Nahal Amud | Eastern Upper Galilee | 32.94 | 35.48 | Warburg S. |
| HUJINVPSE 584 | Garypinidae | *Garypinus* | 2 | 2017 | June | 9 | Mt. Meron | Galil | 32.99 | 35.41 | E. Gavish Regev et al. |
| HUJINVPSE 711 | Garypinidae | *Garypinus* | 3 | 2017 | June | 11 | Tel Dan Reserve | Galil | 33.25 | 35.65 | Opiliones curse |
| HUJINVPSE 930 | Garypinidae | *Garypinus* | 1 | 2022 | October | 22 | Snir | Galilee | 33.24 | 35.68 | Chipman A.D., Edgecomb G.D. |
| HUJINVPSE 949 | Garypinidae | *Garypinus* | 2 | 2022 | August | 16 | Nahal Socho | Shfelat Yehudah | 31.63 | 34.97 | EGR, PPS, GG |
| HUJINVPSE 593 | Garypinidae | *Garypinus asper* | 3 | 2017 | June | 9 | Nahal Bezet | Galil | 33.07 | 35.7 | E. Gavish Regev et al. |
| HUJINVPSE 690 | Garypinidae | *Garypinus asper* | 1 | 2018 | August | 22 | Yehiam wadi | Western Galilee | 32.99 | 35.22 | Aharon S. |
| HUJINVPSE 694 | Garypinidae | *Garypinus asper* | 5 | 2018 | July | 24 | Serach cave | Western Galilee | 33.07 | 35.24 | Aharon S. |
| HUJINVPSE 729 | Garypinidae | *Garypinus asper* | 1 | 2018 | July | 24 | Serach cave | Galilee | 33.07 | 35.24 | Aharon S. |
| HUJINVPSE 854 | Garypinidae | *Garypinus asper* | 1 | 2022 | June | 3 | Mt. Meiron- Hurfeish | Upper Galilee | 33.02 | 35.33 | M. Finkel , Y. Goren |
| HUJINVPSE 855 | Garypinidae | *Garypinus asper* | 1 | 2022 | June | 12 | Mt. Meiron- Hurfeish | Upper Galilee | 33.02 | 35.33 | M. Finkel , Y. Goren |
| HUJINVPSE 856 | Garypinidae | *Garypinus asper* | 1 | 2022 | June | 3 | Mt. Meiron- Hurfeish | Upper Galilee | 33.02 | 35.33 | M. Finkel , Y. Goren |
| HUJINVPSE 858 | Garypinidae | *Garypinus asper* | 1 | 2022 | June | 12 | Mt. Meiron- Humema | Upper Galilee | 33.01 | 35.4 | M. Finkel , Y. Goren |
| HUJINVPSE 859 | Garypinidae | *Garypinus asper* | 1 | 2022 | May | 1 | Mt. Meiron- Hurfeish | Upper Galilee | 33.02 | 35.33 | M. Finkel , Y. Goren |
| HUJINVPSE 861 | Garypinidae | *Garypinus asper* | 1 | 2022 | May | 1 | Mt. Meiron- Hurfeish | Upper Galilee | 33.02 | 35.33 | M. Finkel , Y. Goren |
| HUJINVPSE 862 | Garypinidae | *Garypinus asper* | 1 | 2022 | May | 1 | Mt. Meiron- Hurfeish | Upper Galilee | 33.02 | 35.33 | M. Finkel , Y. Goren |
| HUJINVPSE 863 | Garypinidae | *Garypinus asper* | 1 | 2022 | April | 21 | Mt. Meiron- Hurfeish | Upper Galilee | 33.02 | 35.33 | M. Finkel , Y. Goren |
| HUJINVPSE 865 | Garypinidae | *Garypinus asper* | 1 | 2022 | May | 19 | Mt. Meiron- Hurfeish | Upper Galilee | 33.02 | 35.33 | M. Finkel , Y. Goren |
| HUJINVPSE 866 | Garypinidae | *Garypinus asper* | 1 | 2022 | May | 28 | Mt. Meiron- Hurfeish | Upper Galilee | 33.02 | 35.33 | M. Finkel , Y. Goren |
| HUJINVPSE 869 | Garypinidae | *Garypinus asper* | 1 | 2022 | May | 19 | Mt. Meiron- Hurfeish | Upper Galilee | 33.02 | 35.33 | M. Finkel , Y. Goren |
| HUJINVPSE 870 | Garypinidae | *Garypinus asper* | 1 | 2022 | May | 19 | Mt. Meiron- Hurfeish | Upper Galilee | 33.02 | 35.33 | M. Finkel , Y. Goren |
| HUJINVPSE 871 | Garypinidae | *Garypinus asper* | 1 | 2022 | May | 28 | Mt. Meiron- Hurfeish | Upper Galilee | 33.02 | 35.33 | M. Finkel , Y. Goren |
| HUJINVPSE 873 | Garypinidae | *Garypinus asper* | 1 | 2022 | May | 19 | Mt. Meiron- Hurfeish | Upper Galilee | 33.02 | 35.33 | M. Finkel , Y. Goren |
| HUJINVPSE 876 | Garypinidae | *Garypinus asper* | 1 | 2022 | May | 1 | Mt. Meiron- Hurfeish | Upper Galilee | 33.02 | 35.33 | M. Finkel , Y. Goren |
| HUJINVPSE 877 | Garypinidae | *Garypinus asper* | 1 | 2022 | May | 1 | Mt. Meiron- Hurfeish | Upper Galilee | 33.02 | 35.33 | M. Finkel , Y. Goren |
| HUJINVPSE 879 | Garypinidae | *Garypinus asper* | 1 | 2022 | May | 1 | Mt. Meiron- Hurfeish | Upper Galilee | 33.02 | 35.33 | M. Finkel , Y. Goren |
| HUJINVPSE 881 | Garypinidae | *Garypinus asper* | 1 | 2022 | May | 1 | Mt. Meiron- Hurfeish | Upper Galilee | 33.02 | 35.33 | M. Finkel , Y. Goren |
| HUJINVPSE 882 | Garypinidae | *Garypinus asper* | 1 | 2022 | May | 9 | Mt. Meiron- Hurfeish | Upper Galilee | 33.02 | 35.33 | M. Finkel , Y. Goren |
| HUJINVPSE 887 | Garypinidae | *Garypinus asper* | 1 | 2022 | May | 1 | Mt. Meiron- Hurfeish | Upper Galilee | 33.02 | 35.33 | M. Finkel , Y. Goren |
| HUJINVPSE 893 | Garypinidae | *Garypinus asper* | 1 | 2022 | June | 20 | Mt. Meiron- Hurfeish | Upper Galilee | 33.02 | 35.33 | M. Finkel , Y. Goren |
| HUJINVPSE 583 | Garypinidae | *Garypinus asper* | 3 | 2017 | June | 10 | N. Carmel | Carmel | 32.57 | 35.06 | E. Gavish Regev et al. |
| HUJINVPSE 731 | Garypinidae | *Garypinus asper* | 2 |  |  |  | Sefunim cave | Carmel | 32.74 | 34.98 | Aharon S. |
| HUJINVPSE 874 | Garypinidae | *Garypinus asper* | 1 | 2022 | May | 28 | Mt. Meiron- Hurfeish | Upper Galilee | 33.02 | 35.33 | M. Finkel , Y. Goren |
| HUJINVPSE 875 | Garypinidae | *Garypinus asper* | 1 | 2022 | May | 28 | Mt. Meiron- Hurfeish | Upper Galilee | 33.02 | 35.33 | M. Finkel , Y. Goren |
| HUJINVPSE 880 | Garypinidae | *Garypinus asper* | 1 | 2022 | May | 1 | Mt. Meiron- Hurfeish | Upper Galilee | 33.02 | 35.33 | M. Finkel , Y. Goren |
| HUJINVPSE 892 | Garypinidae | *Garypinus asper* | 1 | 2022 | June | 30 | Mt. Meiron- Hurfeish | Upper Galilee | 33.02 | 35.33 | M. Finkel , Y. Goren |
| HUJINVPSE 896 | Garypinidae | *Garypinus asper* | 1 | 2022 | June | 30 | Mt. Meiron- Hurfeish | Upper Galilee | 33.02 | 35.33 | M. Finkel , Y. Goren |
| HUJINVPSE 897 | Garypinidae | *Garypinus asper* | 1 | 2022 | June | 20 | Mt. Meiron- Hurfeish | Upper Galilee | 33.02 | 35.33 | M. Finkel , Y. Goren |
| HUJINVPSE 898 | Garypinidae | *Garypinus asper* | 1 | 2022 | June | 20 | Mt. Meiron- Humema | Upper Galilee | 33.01 | 35.4 | M. Finkel , Y. Goren |
| HUJINVPSE 932 | Garypinidae | *Garypinus asper* | 2 | 2022 | October | 27 | Tel Sokho | Shfelat Yehudah | 31.64 | 34.97 | EGR, Daniel Alfred, Aharon S. |
| HUJINVPSE 319 | Garypinidae | *Garypinus dimidiatus* | 1 | 1961 | September | 22 | Mt. Meron, 2 km north to Jermak | Galil | 32.99 | 35.41 |  |
| HUJINVPSE 249 | Garypinidae | *Garypinus dimidiatus* | 1 | 1967 | April | 12 | Nahal Bezet | Galil | 33.07 | 35.2 | Levy G. L. |
| HUJINVPSE 581 | Garypinidae | *Garypinus dimidiatus* | 1 | 2017 | June | 9 | Bar`am Froset | Galil | 33.04 | 35.41 | E. Gavish Regev et al. |
| HUJINVPSE 582 | Garypinidae | *Garypinus dimidiatus* | 1 | 2017 | June | 9 | Nahal Bezet | Galil | 33.07 | 35.2 | E. Gavish Regev et al. |
| HUJINVPSE 304 | Garypinidae | *Garypinus dimidiatus* | 1 | 1961 | May | 26 | Zikhron Ya'aqov | Carmel | 32.56 | 34.94 | Amitai P. A. |
| HUJINVPSE 587 | Garypinidae | *Garypinus dimidiatus* | 9 | 2017 | June | 10 | Nahal Oren | Carmel | 32.72 | 34.98 | E. Gavish Regev et al. |
| HUJINVPSE 446 | Garypinidae | *Garypinus dimidiatus* | 1 | 1968 | March | 4 | Nahal Sha'ar | Samaria | 32.12 | 35.06 | Costa M. C. |
| HUJINVPSE 99 | Garypinidae | *Garypinus dimidiatus* | 1 | 1939 | December |  | Kiryat Anavim | Judea | 31.81 | 35.12 |  |
| HUJINVPSE 104 | Garypinidae | *Garypinus dimidiatus* | 1 | 1943 | March | 31 | Aqua Bella (En Hemed) | Judea | 31.8 | 35.13 |  |
| HUJINVPSE 340 | Garypinidae | *Garypinus dimidiatus* | 1 | 1961 | May | 25 | Motza (km.7) | Judea | 31.79 | 35.17 | Amitai P. A. |
| HUJINVPSE 344 | Garypinidae | *Garypinus dimidiatus* | 1 | 1961 | August | 17 | Spring of Motza | Judea | 31.79 | 35.17 | Amitai P. A. |
| HUJINVPSE 368 | Garypinidae | *Garypinus dimidiatus* | 1 | 1961 | August | 17 | Spring of Motza | Judea | 31.79 | 35.17 | Amitai P. A. |
| HUJINVPSE 588 | Garypinidae | *Garypinus dimidiatus* | 1 | 2017 | June | 19 | Soreq Nature Reserve | Judea | 31.36 | 35.08 | E. Gavish Regev et al. |
| HUJINVPSE 591 | Garypinidae | *Garypinus dimidiatus* | 1 | 2017 | June | 19 | Nahal Ktalav | Judea | 31.99 | 35.42 | E. Gavish Regev et al. |
| HUJINVPSE 712 | Garypinidae | *Garypinus dimidiatus* | 1 | 2017 | June | 19 | Soreq Nature Reserve | Judea | 31.36 | 35.08 | E. Gavish Regev et al. |
| HUJINVPSE 767 | Garypinidae | *Garypinus dimidiatus* | 2 | 2017 | June | 19 | Hirbat Sa'adim | Judea | 31.75 | 35.13 | E. Gavish Regev et al. |
| HUJINVPSE 105 | Garypinidae | *Garypinus dimidiatus* | 1 |  |  |  | Wadi Lifta, Jerusalem | Judea | 31.79 | 35.2 |  |
| HUJINVPSE 303 | Geogarypidae | *Geogarypus pulcher* | 2 | 1966 | April | 1 | Hula | Hula valley | 33.07 | 35.6 | Margalith J. M. |
| HUJINVPSE 857 | Geogarypidae | *Geogarypus pulcher* | 1 | 2022 | June | 3 | Mt. Meiron- Hurfeish | Upper Galilee | 33.02 | 35.33 | M. Finkel , Y. Goren |
| HUJINVPSE 868 | Geogarypidae | *Geogarypus pulcher* | 1 | 2022 | May | 19 | Mt. Meiron- Hurfeish | Upper Galilee | 33.02 | 35.33 | M. Finkel , Y. Goren |
| HUJINVPSE 872 | Geogarypidae | *Geogarypus pulcher* | 1 | 2022 | May | 19 | Mt. Meiron- Hurfeish | Upper Galilee | 33.02 | 35.33 | M. Finkel , Y. Goren |
| HUJINVPSE 878 | Geogarypidae | *Geogarypus pulcher* | 1 | 2022 | May | 1 | Mt. Meiron- Hurfeish | Upper Galilee | 33.02 | 35.33 | M. Finkel , Y. Goren |
| HUJINVPSE 884 | Geogarypidae | *Geogarypus pulcher* | 1 | 2022 | May | 1 | Mt. Meiron- Hurfeish | Upper Galilee | 33.02 | 35.33 | M. Finkel , Y. Goren |
| HUJINVPSE 886 | Geogarypidae | *Geogarypus pulcher* | 1 | 2022 | May | 1 | Mt. Meiron- Hurfeish | Upper Galilee | 33.02 | 35.33 | M. Finkel , Y. Goren |
| HUJINVPSE 463 | Geogarypidae | *Geogarypus pulcher* | 1 | 1968 | February | 2 | Carmel | Carmel | 32.73 | 35.04 | Costa M. C. |
| HUJINVPSE 299 | Geogarypidae | *Geogarypus pulcher* | 1 | 1965 | November | 1 | K'far Masarik | Northern coastal Plain | 32.89 | 35.1 | Margalith J. M. |
| HUJINVPSE 455 | Geogarypidae | *Geogarypus pulcher* | 1 | 1965 | March | 19 | Gan Sh'muel | Coastal plain- Center | 32.45 | 34.95 |  |
| HUJINVPSE 107 | Geogarypidae | *Geogarypus pulcher* | 1 | 1957 | August | 1 | Bet Meir | Judea | 31.79 | 35.04 | Wahrman J. W. |
| HUJINVPSE 928 | Geogarypidae | *Geogarypus shulovi* | 2 | 2022 | October | 22 | Snir | Galilee | 33.24 | 35.67 | Chipman A.D., Edgecomb G.D. |
| HUJINVPSE 815 | Geogarypidae | *Geogarypus shulovi* | 1 | 2022 | April | 2 | Ramot Menashe | Carmel | 32.6 | 35.06 | Topper A. |
| HUJINVPSE 111 | Geogarypidae | *Geogarypus shulovi* | 1 | 1941 | March | 24 | Arab Sajada ('En Nutra) | Galil | 33.08 | 35.64 | Shulov A. |
| HUJINVPSE 112 | Geogarypidae | *Geogarypus shulovi* | 1 | 1945 | March | 13 | Dalia | Samaria | 32.59 | 35.07 | Shulov A. |
| HUJINVPSE 268 | Hesperolpiidae | *Calocheirus atopos* | 1 | 1961 | May | 13 | Tel Hazor | Galil | 33.02 | 35.57 | Amitai P. A. |
| HUJINVPSE 357 | Hesperolpiidae | *Calocheirus atopos* | 1 | 1961 | May | 13 | Tel Hazor | Galil | 33.02 | 35.57 | Amitai P. A. |
| HUJINVPSE 508 | Hesperolpiidae | *Calocheirus atopos* | 1 | 1961 | August | 30 | Lahav | Negev | 31.38 | 34.86 | Freund D. F. |
| HUJINVPSE 702 | Hesperolpiidae | *Calocheirus atopos* | 1 | 1963 | April | 28 | Lahav | Negev | 31.38 | 34.86 | Levy G. L. |
| HUJINVPSE 926 | Hesperolpiidae | *Calocheirus atopos* | 1 | 2022 | August | 16 | Nahal Socho | Shfelat Yehudah | 31.63 | 34.97 | EGR, PPS, GG |
| HUJINVPSE 488 | Hesperolpiidae | *Calocheirus atopos* | 1 | 1970 | November | 16 | Wadi Daraje | Judea | 31.59 | 35.37 | Tsabar G. T. |
| HUJINVPSE 468 | Hesperolpiidae | *Calocheirus atopos* | 1 | 1974 | April | 30 | Ma'ale Adomim | Judea | 31.78 | 35.3 | Tsabar G. T. |
| HUJINVPSE 509 | Hesperolpiidae | *Calocheirus atopos* | 1 | 1974 | April | 30 | Ma'ale Adomim | Judea | 31.78 | 35.3 | Tsabar G. T. |
| HUJINVPSE 705 | Hesperolpiidae | *Calocheirus atopos* | 1 | 1963 | April | 10 | N. Gerar (Brosh) | Negev | 31.38 | 34.63 | Levy G. L. |
| HUJINVPSE 842 | Hesperolpiidae | *Calocheirus atopos* | 1 | 2022 | May | 17 | Sayeret Shaked Park (near Ofakim) | Negev-West | 31.28 | 34.65 | Peleg Jakubovits |
| HUJINVPSE 351 | Hesperolpiidae | *Calocheirus atopos* | 1 | 1961 | April | 30 | Ben Shemen | Shfelat Yehudah | 31.96 | 34.92 | Amitai P. A. |
| HUJINVPSE 469 | Hesperolpiidae |  | 1 | 1968 | May | 4 | Mt. Hermon, 1800m | Hermon | 33.32 | 35.78 | Costa M. C. |
| HUJINVPSE 272 | Menthidae | *Paramenthus shulovi* | 1 | 1967 | May | 4 | Jerusalem | Judea | 31.77 | 35.21 | Nitzan M. N. |
| HUJINVPSE 522 | Neobisiidae | *Neobisium validum* | 23 | 1965 | December | 23 | Nahal Amud | Galil | 32.97 | 35.47 | Costa M. C. |
| HUJINVPSE 277 | Neobisiidae | *Neobisium validum* | 1 | 1975 | April | 6 | Kefar Giladi | Galil | 33.24 | 35.57 | Amitai P. A. |
| HUJINVPSE 597 | Neobisiidae | *Neobisium validum* | 1 | 2021 | January | 3 | Nahal Kziv | Galilee | 33.04 | 35.27 | Finkel Meiri |
| HUJINVPSE 598 | Neobisiidae | *Neobisium validum* | 1 | 2021 | January | 3 | Nahal Kziv | Galilee | 33.04 | 35.27 | Finkel Meiri |
| HUJINVPSE 599 | Neobisiidae | *Neobisium validum* | 1 | 2021 | January | 3 | Nahal Kziv | Galilee | 33.04 | 35.27 | Finkel Meiri |
| HUJINVPSE 864 | Neobisiidae | *Neobisium validum* | 1 | 2022 | April | 14 | Mt. Meiron- Humema | Upper Galilee | 33.01 | 35.4 | M. Finkel , Y. Goren |
| HUJINVPSE 342 | Neobisiidae | *Neobisium validum* | 1 | 1961 | May | 12 | Mount Tavor | Galil | 32.69 | 35.39 | Amitai P. A. |
| HUJINVPSE 355 | Neobisiidae | *Neobisium validum* | 1 | 1967 | April | 23 | Bet Oren | Carmel | 32.73 | 35.01 | Amitai P. A. |
| HUJINVPSE 358 | Neobisiidae | *Neobisium validum* | 1 | 1972 | January | 1 | Carmel | Carmel | 32.74 | 35.03 | Weisberg I. W. |
| HUJINVPSE 380 | Neobisiidae | *Neobisium validum* | 1 | 1972 | January | 1 | Carmel | Carmel | 32.74 | 35.03 | Weisberg I. W. |
| HUJINVPSE 230 | Neobisiidae | *Neobisium validum* | 1 | 1976 | March | 31 | Carmel: 40' Oaks grove | Carmel | 32.76 | 35.03 | Warburg M. W. |
| HUJINVPSE 360 | Neobisiidae | *Neobisium validum* | 1 | 1964 | February | 8 | Rosh Ha'nikra | Northern coastal Plain | 33.09 | 35.12 | Levanoni U. L. |
| HUJINVPSE 541 | Neobisiidae | *Neobisium validum* | 2 | 1966 | December | 7 | Rosh Hanikra | Northern Coastal Plain | 33.09 | 35.11 | Costa M. C. |
| HUJINVPSE 117 | Neobisiidae | *Neobisium validum* | 1 | 1937 | February | 5 | Geva | Jezreel Valley | 32.57 | 35.37 | Shulov A. |
| HUJINVPSE 138 | Neobisiidae | *Neobisium validum* | 1 | 1945 | December | 3 | Kfar Echezkiel | Jezreel Valley | 32.57 | 35.36 | Shulov A. |
| HUJINVPSE 253 | Neobisiidae | *Neobisium validum* | 1 | 1965 | March | 8 | Mishmar Ha'emek | Jezreel Valley | 32.61 | 35.14 | Costa M. C. |
| HUJINVPSE 448 | Neobisiidae | *Neobisium validum* | 8 | 1966 | November | 13 | Allone Abba | Galil | 32.73 | 35.17 | Costa M. C. |
| HUJINVPSE 440 | Neobisiidae | *Neobisium validum* | 6 | 1967 | December | 8 | Tivon | Jezreel valley | 32.72 | 35.13 | Costa M. C. |
| HUJINVPSE 443 | Neobisiidae | *Neobisium validum* | 1 | 1967 | March | 27 | Mishmar Ha'emek | Jezreel Valley | 32.61 | 35.14 | Costa M. C. |
| HUJINVPSE 451 | Neobisiidae | *Neobisium validum* | 2 | 1967 | April | 28 | Mishmar Ha'emek | Jezreel Valley | 32.61 | 35.14 | Costa M. C. |
| HUJINVPSE 459 | Neobisiidae | *Neobisium validum* | 1 | 1967 | March | 31 | Tivon | Jezreel valley | 32.72 | 35.13 | Costa M. C. |
| HUJINVPSE 492 | Neobisiidae | *Neobisium validum* | 23 | 1967 | January | 8 | Allone Abba | Galil | 32.73 | 35.17 | Costa M. C. |
| HUJINVPSE 683 | Neobisiidae | *Neobisium validum* | 2 | 1967 | March | 11 | Mishmar Ha'emek | Jezreel Valley | 32.61 | 35.14 | Costa M. C. |
| HUJINVPSE 680 | Neobisiidae | *Neobisium validum* | 1 | 1968 | March | 4 | Nahal Sha'ar | Samaria | 32.12 | 35.06 | Costa M. C. |
| HUJINVPSE 233 | Neobisiidae | *Neobisium validum* | 1 | 1974 | December | 18 | Gilbo'a | Samaria | 32.49 | 35.41 | Warburg M. W. |
| HUJINVPSE 130 | Neobisiidae | *Neobisium validum* | 1 | 1942 | March | 29 | Tiberias, hot spring | Galil | 32.77 | 35.55 |  |
| HUJINVPSE 284 | Neobisiidae | *Neobisium validum* | 1 | 1942 | March | 5 | Rosh Ha'ayin, Ras-el 'ain (Petach Tikva) | Coastal plain- Center | 32.08 | 34.96 | Steinitz H. S. |
| HUJINVPSE 237 | Neobisiidae | *Neobisium validum* | 2 | 2001 | November | 11 | Adulam Reserve | Judea | 31.64 | 34.94 | Mandelik Y. M. |
| HUJINVPSE 774 | Neobisiidae | *Neobisium validum* | 1 | 2022 | January | 11 | Hazan Hills, Amatzia | Shfelat Yehudah | 31.52 | 34.91 | Pinchevsky D. |
| HUJINVPSE 775 | Neobisiidae | *Neobisium validum* | 1 | 2022 | January | 11 | Hazan Hills, Amatzia | Shfelat Yehudah | 31.52 | 34.91 | Pinchevsky D. |
| HUJINVPSE 777 | Neobisiidae | *Neobisium validum* | 1 | 2022 | January | 11 | Hazan Hills, Amatzia | Shfelat Yehudah | 31.52 | 34.91 | Pinchevsky D. |
| HUJINVPSE 113 | Neobisiidae | *Neobisium validum* | 1 | 1939 | December | 15 | Qiryat Anavim | Judea | 31.81 | 35.12 |  |
| HUJINVPSE 116 | Neobisiidae | *Neobisium validum* | 1 | 1939 | December |  | Qiryat Anavim | Judea | 31.81 | 35.12 |  |
| HUJINVPSE 118 | Neobisiidae | *Neobisium validum* | 1 | 1943 | February | 16 | Jerusalem, Ge-Hinnom | Judea | 31.77 | 35.23 |  |
| HUJINVPSE 119 | Neobisiidae | *Neobisium validum* | 1 | 1943 | March | 10 | Jerusalem, near Hamkasher- Garage | Judea | 31.78 | 35.2 |  |
| HUJINVPSE 120 | Neobisiidae | *Neobisium validum* | 1 | 1943 | April | 10 | Jerusalem, Montefiori garage | Judea | 31.78 | 35.22 |  |
| HUJINVPSE 123 | Neobisiidae | *Neobisium validum* | 1 | 1943 | March | 10 | Jerusalem, near Home for the blind | Judea | 31.79 | 35.2 |  |
| HUJINVPSE 125 | Neobisiidae | *Neobisium validum* | 1 | 1943 | November | 6 | Jerusalem, Yefe-Nof, | Judea | 31.78 | 35.18 |  |
| HUJINVPSE 129 | Neobisiidae | *Neobisium validum* | 1 | 1943 | January | 9 | Jerusalem, Ge-Hinnom | Judea | 31.77 | 35.23 |  |
| HUJINVPSE 114 | Neobisiidae | *Neobisium validum* | 1 | 1944 | March | 6 | Bittir to Ras Abu Ammar | Judea | 31.73 | 35.11 |  |
| HUJINVPSE 115 | Neobisiidae | *Neobisium validum* | 1 | 1944 | December | 2 | Nahal Revida (=Wadi Ruwas) | Judea | 31.78 | 35.17 |  |
| HUJINVPSE 133 | Neobisiidae | *Neobisium validum* | 1 | 1944 | January | 7 | Betlehem | Judea | 31.71 | 35.2 | Haas G. H. |
| HUJINVPSE 141 | Neobisiidae | *Neobisium validum* | 1 | 1944 | February | 2 | Nahal Revida (=Wadi Ruwas) | Judea | 31.78 | 35.17 | Haas G. H. |
| HUJINVPSE 142 | Neobisiidae | *Neobisium validum* | 1 | 1944 | November | 25 | Jerusalem | Judea | 31.77 | 35.21 | Shulov A. |
| HUJINVPSE 144 | Neobisiidae | *Neobisium validum* | 1 | 1944 | February | 5 | Wadi Sarar | Judea | 31.81 | 34.87 | Haas G. H. |
| HUJINVPSE 246 | Neobisiidae | *Neobisium validum* | 2 | 1944 | January | 28 | Qiryat Anavim | Judea | 31.81 | 35.12 | Steinitz H. S. |
| HUJINVPSE 126 | Neobisiidae | *Neobisium validum* | 1 | 1945 | December | 22 | Jerusalem | Judea | 31.77 | 35.21 |  |
| HUJINVPSE 248 | Neobisiidae | *Neobisium validum* | 2 | 1946 | March | 23 | Jerusalem, Ha'matzleva Valley | Judea | 31.77 | 35.21 | Steinitz H. S. |
| HUJINVPSE 140 | Neobisiidae | *Neobisium validum* | 1 | 1947 | February | 6 | Kfar Ezion | Judea | 31.65 | 35.11 | Shulov A. |
| HUJINVPSE 131 | Neobisiidae | *Neobisium validum* | 1 | 1949 | December | 15 | Jerusalem | Judea | 31.77 | 35.21 |  |
| HUJINVPSE 135 | Neobisiidae | *Neobisium validum* | 1 | 1949 | December | 17 | Qiryat Anavim | Judea | 31.77 | 35.21 |  |
| HUJINVPSE 128 | Neobisiidae | *Neobisium validum* | 1 | 1950 | December | 1 | Jerusalem | Judea | 31.77 | 35.21 |  |
| HUJINVPSE 132 | Neobisiidae | *Neobisium validum* | 1 | 1950 | March | 13 | Jerusalem | Judea | 31.77 | 35.21 |  |
| HUJINVPSE 136 | Neobisiidae | *Neobisium validum* | 1 | 1950 | December | 1 | Jerusalem | Judea | 31.77 | 35.21 |  |
| HUJINVPSE 139 | Neobisiidae | *Neobisium validum* | 1 | 1950 | December | 1 | Jerusalem | Judea | 31.77 | 35.21 |  |
| HUJINVPSE 145 | Neobisiidae | *Neobisium validum* | 1 | 1950 | April | 1 | Jerusalem | Judea | 31.77 | 35.21 |  |
| HUJINVPSE 146 | Neobisiidae | *Neobisium validum* | 1 | 1950 | December | 1 | Jerusalem | Judea | 31.77 | 35.21 |  |
| HUJINVPSE 121 | Neobisiidae | *Neobisium validum* | 1 | 1952 | January | 15 | Aqua Bella (En Hemed) | Judea | 31.8 | 35.13 | Feldman |
| HUJINVPSE 124 | Neobisiidae | *Neobisium validum* | 1 | 1958 | January | 13 | Jerusalem | Judea | 31.77 | 35.21 | Slavin S. S. |
| HUJINVPSE 127 | Neobisiidae | *Neobisium validum* | 1 | 1958 | January | 13 | Jerusalem | Judea | 31.77 | 35.21 | Pener M. P. |
| HUJINVPSE 137 | Neobisiidae | *Neobisium validum* | 1 | 1959 | December | 29 | Hirbat Sa'adim (Hirbet Qaryet Saide) | Judea | 31.75 | 35.13 | Yarkoni |
| HUJINVPSE 239 | Neobisiidae | *Neobisium validum* | 1 | 1963 | April | 19 | Jerusalem | Judea | 31.77 | 35.21 |  |
| HUJINVPSE 549 | Neobisiidae | *Neobisium validum* | 2 | 1964 | January | 9 | Hirbat Sa'adim (Hirbet Qaryet Saide) | Judea | 31.75 | 35.13 | Katznelson |
| HUJINVPSE 312 | Neobisiidae | *Neobisium validum* | 1 | 1965 | December |  | Bar Giora | Judea | 31.73 | 35.06 |  |
| HUJINVPSE 309 | Neobisiidae | *Neobisium validum* | 1 | 1966 | April | 13 | Mavo Beitar | Judea | 31.72 | 35.11 |  |
| HUJINVPSE 264 | Neobisiidae | *Neobisium validum* | 1 | 1967 | May | 5 | Jerusalem | Judea | 31.77 | 35.21 | Tsabar G. T. |
| HUJINVPSE 336 | Neobisiidae | *Neobisium validum* | 1 | 1967 | January | 30 | Bar Giora | Judea | 31.73 | 35.06 | Zinner H. Z. |
| HUJINVPSE 347 | Neobisiidae | *Neobisium validum* | 1 | 1970 | January | 10 | Jerusalem | Judea | 31.77 | 35.21 | Shalmon B. S. |
| HUJINVPSE 363 | Neobisiidae | *Neobisium validum* | 1 | 1970 | January | 10 | Jerusalem | Judea | 31.77 | 35.21 | Shalmon B. S. |
| HUJINVPSE 370 | Neobisiidae | *Neobisium validum* | 1 | 1970 | January | 10 | Jerusalem | Judea | 31.77 | 35.21 | Shalmon B. S. |
| HUJINVPSE 270 | Neobisiidae | *Neobisium validum* | 1 | 1981 | December | 5 | Jerusalem | Judea | 31.77 | 35.21 | Levy G. L. |
| HUJINVPSE 476 | Neobisiidae | *Neobisium validum* | 1 | 1982 | November | 25 | Jerusalem | Judea | 31.77 | 35.21 | Amitai P. A. |
| HUJINVPSE 505 | Neobisiidae | *Neobisium validum* | 1 | 1982 | December | 15 | Bet Zayit | Judea | 31.78 | 35.16 | Avital E. A. |
| HUJINVPSE 254 | Neobisiidae | *Neobisium validum* | 3 | 2001 | November | 11 | Sansan Reserve | Judea | 31.69 | 35.06 | Mandelik Y. M. |
| HUJINVPSE 386 | Neobisiidae | *Neobisium validum* | 2 | 1972 | February | 17 | Dorot-Ruhama | Negev | 31.49 | 34.67 | Weisberg I. W. |
| HUJINVPSE 281 | Neobisiidae | *Neobisium validum* | 1 | 1964 | November | 30 | Yeruham | Negev | 30.99 | 34.91 | Bloud & White |
| HUJINVPSE 753 | Neobisiidae | *Neobisium validum* | 1 | 2022 | February | 18 | Bor Hemet | Negev | 30.59 | 34.71 | Harms D., EGR, Warburg S. |
| HUJINVPSE 754 | Neobisiidae | *Neobisium validum* | 1 | 2022 | February | 18 | Bor Hemet | Negev | 30.59 | 34.71 | Harms D., EGR, Warburg S. |
| HUJINVPSE 234 | Neobisiidae | *Neobisium validum* | 5 | 1998 | January |  | Ramat Magshimim | Golan | 32.85 | 35.81 | Warburg I.W. |
| HUJINVPSE 122 | Neobisiidae | *Neobisium validum* | 1 | 1939 | December | 9 |  |  |  |  |  |
| HUJINVPSE 134 | Neobisiidae | *Neobisium validum* | 1 | 1945 | March | 6 |  |  |  |  | J. Bek |
| HUJINVPSE 143 | Neobisiidae | *Neobisium validum* | 1 |  |  |  |  |  |  |  |  |
| HUJINVPSE 945 | Neobisioidae |  | 1 | 2023 | January | 19 | Sussita cave | Golan | 32.78 | 35.66 | Pavlek M. |
| HUJINVPSE 94 | Olpiidae | *Calocheiridius libanoticus* | 1 | 1944 | March | 2 | Elon - Wadi Karkara | Galil | 33.07 | 35.22 | Haas G. H. |
| HUJINVPSE 98 | Olpiidae | *Calocheiridius libanoticus* | 1 | ? | March | 20 | Sh'fia | Carmel | 32.59 | 34.97 |  |
| HUJINVPSE 101 | Olpiidae | *Calocheiridius libanoticus* | 1 | 1938 | March | 12 | Degania | Galil | 32.71 | 35.57 |  |
| HUJINVPSE 102 | Olpiidae | *Calocheiridius libanoticus* | 1 | 1939 | March | 8 | Avichail | Coastal plain center | 32.35 | 34.87 | Shulov A. |
| HUJINVPSE 100 | Olpiidae | *Calocheiridius libanoticus* | 1 | 1944 | March | 16 | Kfar Mallal | Coastal plain- Center | 32.17 | 34.89 | Moskona |
| HUJINVPSE 96 | Olpiidae | *Calocheiridius libanoticus* | 1 | 1942 | December | 24 | Eichenwald south of Hebron | Judea | 31.5 | 35.13 |  |
| HUJINVPSE 95 | Olpiidae | *Calocheiridius libanoticus* | 1 | 1954 | June | 28 | Jerusalem | Judea | 31.77 | 35.21 |  |
| HUJINVPSE 97 | Olpiidae | *Calocheiridius libanoticus* | 1 | 1959 | October | 29 | Qiryat Anavim | Judea | 31.81 | 35.12 | Pener M. P. |
| HUJINVPSE 103 | Olpiidae | *Calocheiridius libanoticus* | 1 | 1946 | April |  | Mahtesh Ramon | Negev Central | 30.59 | 34.84 | Shulov A. |
| HUJINVPSE 947 | Olpiidae | *Calocheiridius libanoticus* | 1 | 2018 | July | 19 | Haruva cave | Judea | 31.91 | 34.96 | Aharon S. |
| HUJINVPSE 595 | Olpiidae | *Halominniza aegyptiaca litoralis* | 1 | 2019 | May | 13-16 | N. Ashalim lower | Dead Sea | 31.07 | 35.31 | A. Gera |
| HUJINVPSE 212 | Olpiidae | *Halominniza aegyptiaca litoralis* | 1 | 1941 | February | 23 | Bet-HaArava, Near, Bank Of Jordan | Dead Sea | 31.8 | 35.5 | Shulov A. |
| HUJINVPSE 209 | Olpiidae | *Halominniza aegyptiaca litoralis* | 1 | 1957 | August | 16 | Sedom | Dead Sea | 31.09 | 35.4 | Wahrman J. W. |
| HUJINVPSE 421 | Olpiidae | *Halominniza aegyptiaca litoralis* | 1 | 1970 | April | 9 | Kalia | Dead Sea | 31.73 | 35.49 | Faunistics |
| HUJINVPSE 210 | Olpiidae | *Halominniza aegyptiaca litoralis* | 2 | 1957 | January | 15 | Elat | Arava | 29.56 | 34.97 | Ginsburg |
| HUJINVPSE 494 | Olpiidae | *Halominniza aegyptiaca litoralis* | 20 | 1974 | June | 14 | Elat, Solar pond | Arava | 29.56 | 34.97 | Dubinsky Z. D. |
| HUJINVPSE 493 | Olpiidae | *Halominniza aegyptiaca litoralis* | 4 | 1981 | August | 15 | Elat, Solar pond | Arava | 29.56 | 34.97 | Dubinsky Z. D. |
| HUJINVPSE 707 | Olpiidae | *Halominniza aegyptiaca litoralis* | 1 | 1946 | April | 21 |  |  |  |  | Steinitz H. S. |
| HUJINVPSE 194 | Olpiidae | *Minniza lindbergi* | 1 | 1941 | April | 20 | El Hamma | Golan | 32.69 | 35.66 | Salz-Bytinski |
| HUJINVPSE 151 | Olpiidae | *Minniza lindbergi* | 1 | 1940 | June | 7 | Jerusalem | Judea | 31.77 | 35.21 |  |
| HUJINVPSE 164 | Olpiidae | *Minniza lindbergi* | 1 | 1953 | May | 19 | Jerusalem | Judea | 31.77 | 35.21 |  |
| HUJINVPSE 147 | Olpiidae | *Minniza lindbergi* | 1 | 1954 | September | 30 | Jerusalem | Judea | 31.77 | 35.21 |  |
| HUJINVPSE 192 | Olpiidae | *Minniza lindbergi* | 1 | 1954 | June | 28 | Jerusalem | Judea | 31.77 | 35.21 |  |
| HUJINVPSE 168 | Olpiidae | *Minniza lindbergi* | 1 | 1959 | May | 23 | Liffta | Judea | 31.79 | 35.2 | Rosen |
| HUJINVPSE 149 | Olpiidae | *Minniza lindbergi* | 1 | 1922 | October | 13 | Jericho | Dead Sea | 31.87 | 35.46 | Buxton P. A. B. |
| HUJINVPSE 155 | Olpiidae | *Minniza lindbergi* | 1 | 1939 | February | 14 | Jericho | Dead Sea | 31.87 | 35.46 |  |
| HUJINVPSE 157 | Olpiidae | *Minniza lindbergi* | 1 | 1944 | April | 21 | Between Kalia and 'En Feshkha | Dead Sea | 31.74 | 35.46 |  |
| HUJINVPSE 196 | Olpiidae | *Minniza lindbergi* | 1 | 1944 | March | 19 | En Gedi | Dead Sea | 31.47 | 35.39 |  |
| HUJINVPSE 161 | Olpiidae | *Minniza lindbergi* | 1 | 1957 | March | 25 | En Gedi sulphuric springs | Dead Sea | 31.47 | 35.39 | Shulov A. |
| HUJINVPSE 169 | Olpiidae | *Minniza lindbergi* | 1 | 1957 | August | 18 | En Gedi | Dead Sea | 31.47 | 35.39 | Wahrman J. W. |
| HUJINVPSE 187 | Olpiidae | *Minniza lindbergi* | 1 | 1957 | August | 16 | En Gedi | Dead Sea | 31.47 | 35.39 | Wahrman J. W. |
| HUJINVPSE 190 | Olpiidae | *Minniza lindbergi* | 1 | 1958 | July | 25 | En Boqeq | Dead Sea | 31.2 | 35.36 | Shulov A. |
| HUJINVPSE 162 | Olpiidae | *Minniza lindbergi* | 1 | 1961 | June | 3 | En Gev | Galil | 32.79 | 35.64 | Katznelson |
| HUJINVPSE 148 | Olpiidae | *Minniza lindbergi* | 1 | 1947 | March | 18 | Wadi Fukra | Negev - Arava | 30.95 | 35.28 |  |
| HUJINVPSE 153 | Olpiidae | *Minniza lindbergi* | 1 | 1947 | March | 19 | Ein Moslo | Negev - Arava | 30.66 | 35.18 | Shulov A. |
| HUJINVPSE 175 | Olpiidae | *Minniza lindbergi* | 1 | 1947 | March | 20 | Nahal Timna | Arava | 29.81 | 35 | Shulov A. |
| HUJINVPSE 170 | Olpiidae | *Minniza lindbergi* | 1 | 1954 | May | 1 | Arava Road, Km. 32 | Arava | 29.69 | 34.99 | Wahrman J. W. |
| HUJINVPSE 193 | Olpiidae | *Minniza lindbergi* | 1 | 1947 | March | 17 | Mamshit | Negev | 31.03 | 35.07 |  |
| HUJINVPSE 152 | Olpiidae | *Minniza lindbergi* | 1 | 1952 | March | 24 | Nahal Lavan | Negev North-West | 30.95 | 34.39 | Wahrman J. W. |
| HUJINVPSE 172 | Olpiidae | *Minniza lindbergi* | 1 | 1954 | March | 22 | Be'er Sheva, 15Km S. of, | Negev | 31.15 | 34.8 | Haas G. H. |
| HUJINVPSE 195 | Olpiidae | *Minniza lindbergi* | 1 | 1949 | April | 15 | Tel-Yeruham, 3.5Km south of | Negev | 30.99 | 34.91 |  |
| HUJINVPSE 165 | Olpiidae | *Minniza lindbergi* | 1 | 1952 | April | 18 | Avdat, 15 Km. south of | Negev | 30.75 | 34.77 | Wahrman J. W. |
| HUJINVPSE 166 | Olpiidae | *Minniza lindbergi* | 1 | 1953 | April | 15 | Tel-Yeruham, 3.5Km south of | Negev | 30.99 | 34.91 |  |
| HUJINVPSE 158 | Olpiidae | *Minniza lindbergi* | 1 | 1954 | March | 23 | Wadi Raman (Nahal Ramon) | Negev | 30.59 | 34.84 |  |
| HUJINVPSE 174 | Olpiidae | *Minniza lindbergi* | 1 | 1954 | March | 23 | Wadi Ramon | Negev | 30.59 | 34.84 |  |
| HUJINVPSE 184 | Olpiidae | *Minniza lindbergi* | 1 | 1956 | March | 15 | Wadi Ramon | Negev | 30.59 | 34.84 | Wahrman J. W. |
| HUJINVPSE 179 | Olpiidae | *Minniza lindbergi* | 1 | 1957 | August | 18 | Nahal Nafha | Negev | 30.73 | 34.83 | Wahrman J. W. |
| HUJINVPSE 181 | Olpiidae | *Minniza lindbergi* | 1 | 1957 | June | 4 to 8 | Wadi Ramon (Trias) | Negev | 30.59 | 34.84 | Werner |
| HUJINVPSE 182 | Olpiidae | *Minniza lindbergi* | 1 | 1957 | June | 6 to 7 | Wadi Ramon | Negev | 30.59 | 34.84 | Werner |
| HUJINVPSE 183 | Olpiidae | *Minniza lindbergi* | 1 | 1957 | April | 1 | Wadi Ramon | Negev | 30.59 | 34.84 | Yarkoni |
| HUJINVPSE 185 | Olpiidae | *Minniza lindbergi* | 1 | 1957 | June | 6 to 7 | Wadi Ramon | Negev | 30.59 | 34.84 | Werner |
| HUJINVPSE 186 | Olpiidae | *Minniza lindbergi* | 1 | 1957 | June | 6 to 7 | Wadi Ramon | Negev | 30.59 | 34.84 | Werner |
| HUJINVPSE 188 | Olpiidae | *Minniza lindbergi* | 1 | 1957 | June | 5 | Wadi Ramon | Negev | 30.59 | 34.84 | Yarkoni |
| HUJINVPSE 150 | Olpiidae | *Minniza lindbergi* | 1 | 1959 | April | 15 | Tel-Yeruham, 3.5Km south of | Negev Central | 30.99 | 34.91 |  |
| HUJINVPSE 154 | Olpiidae | *Minniza lindbergi* | 1 | 1959 | September | 15 | Tel-Yeruham, 3.5Km south of | Negev | 30.99 | 34.91 |  |
| HUJINVPSE 156 | Olpiidae | *Minniza lindbergi* | 1 | 1959 | April | 15 | Tel-Yeruham, 3.5Km south of | Negev | 30.99 | 34.91 |  |
| HUJINVPSE 159 | Olpiidae | *Minniza lindbergi* | 1 | 1959 | April | 15 | Tel-Yeruham, 3.5Km south of | Negev | 30.99 | 34.91 |  |
| HUJINVPSE 160 | Olpiidae | *Minniza lindbergi* | 1 | 1959 | April | 15 | Tel-Yeruham, 3.5Km south of | Negev | 30.99 | 34.91 |  |
| HUJINVPSE 171 | Olpiidae | *Minniza lindbergi* | 1 | 1959 | April | 30 | Avdat, 15 Km. south of | Negev | 30.75 | 34.77 | Wahrman J. W. |
| HUJINVPSE 176 | Olpiidae | *Minniza lindbergi* | 1 | 1959 | April | 30 | Nahal Nafha | Negev | 30.73 | 34.83 | Wahrman J. W. |
| HUJINVPSE 180 | Olpiidae | *Minniza lindbergi* | 1 | 1959 | April | 15 | Tel-Yeruham, 3.5Km south of | Negev | 30.99 | 34.91 |  |
| HUJINVPSE 191 | Olpiidae | *Minniza lindbergi* | 1 | 1959 | April | 15 | Tel-Yeruham, 3.5Km south of | Negev | 30.99 | 34.91 |  |
| HUJINVPSE 167 | Olpiidae | *Minniza lindbergi* | 1 | 1961 | May | 19 | Mamshit | Negev | 31.03 | 35.07 | Wahrman J. W. |
| HUJINVPSE 177 | Olpiidae | *Minniza lindbergi* | 1 |  |  |  |  |  |  |  |  |
| HUJINVPSE 201 | Olpiidae | *Minniza babylonica* | 1 | 1944 | September | 6 | Manara | Galil | 33.2 | 35.55 | Shulov A. |
| HUJINVPSE 247 | Olpiidae | *Minniza babylonica* | 1 | 1944 | September | 8 | Atlit | Northern coastal Plain | 32.71 | 34.94 |  |
| HUJINVPSE 400 | Olpiidae | *Minniza babylonica* | 1 | 1967 | July | 16 | H. el Butesha | Jordan valley | 32.88 | 35.64 | Amitai P. A. |
| HUJINVPSE 474 | Olpiidae | *Minniza babylonica* | 1 | 1972 | May | 12 | Jiftlik | Samaria | 32.17 | 35.47 | Tsabar G. T. |
| HUJINVPSE 686 | Olpiidae | *Minniza babylonica* | 9 | 2019 | June | 25 | Beith HaBeq | kineret lake | 32.89 | 35.62 | E. Gavish Regev et al. |
| HUJINVPSE 276 | Olpiidae | *Minniza babylonica* | 1 | 1961 | August | 30 | Lahav | Negev | 31.38 | 34.86 | Pener M. P. |
| HUJINVPSE 325 | Olpiidae | *Minniza babylonica* | 1 | 1961 | August | 30 | Lahav | Negev | 31.38 | 34.86 | Pener M. P. |
| HUJINVPSE 259 | Olpiidae | *Minniza babylonica* | 1 | 1963 | April | 28 | Lahav | Negev | 31.38 | 34.86 | Levy G. L. |
| HUJINVPSE 274 | Olpiidae | *Minniza babylonica* | 1 | 1963 | April | 28 | Lahav | Negev | 31.38 | 34.86 | Levy G. L. |
| HUJINVPSE 708 | Olpiidae | *Minniza babylonica* | 1 | 1963 | April | 28 | Lahav | Negev | 31.38 | 34.86 | Levy G. L. |
| HUJINVPSE 428 | Olpiidae | *Minniza babylonica* | 2 | 2002 | March | 22 | Adulam Reserve | Judea | 31.64 | 34.94 | Mandelik Y. M. |
| HUJINVPSE 925 | Olpiidae | *Minniza babylonica* | 1 | 2022 | August | 16 | Nahal Socho | Shfelat Yehudah | 31.63 | 34.97 | EGR, PPS, GG |
| HUJINVPSE 198 | Olpiidae | *Minniza babylonica* | 1 | 1941 | December | 10 | Jerusalem | Judea | 31.77 | 35.21 | Shulov A. |
| HUJINVPSE 199 | Olpiidae | *Minniza babylonica* | 1 | 1950 | November | 8 | Bet Zayit | Judea | 31.78 | 35.16 |  |
| HUJINVPSE 300 | Olpiidae | *Minniza babylonica* | 1 | 1961 | August | 17 | Aqua Bella (En Hemed) | Judea | 31.8 | 35.13 | Amitai P. A. |
| HUJINVPSE 346 | Olpiidae | *Minniza babylonica* | 1 | 1961 | June | 17 | Jerusalem | Judea | 31.77 | 35.21 | Amitai P. A. |
| HUJINVPSE 514 | Olpiidae | *Minniza babylonica* | 1 | 1973 | April | 15 | Jerusalem | Judea | 31.77 | 35.21 | Tsabar G. T. |
| HUJINVPSE 515 | Olpiidae | *Minniza babylonica* | 1 | 1973 | April | 15 | Jerusalem | Judea | 31.77 | 35.21 | Tsabar G. T. |
| HUJINVPSE 426 | Olpiidae | *Minniza babylonica* | 1 | 1975 | April | 8 | Jerusalem, Holyland Hotel | Judea | 31.76 | 35.19 | Faunistics |
| HUJINVPSE 813 | Olpiidae | *Minniza babylonica* | 1 | 2017 | June | 19 | Soreq Nature Reserve | Judea | 31.8 | 35.07 | Opiliones curse |
| HUJINVPSE 250 | Olpiidae | *Minniza babylonica* | 1 | 1963 | April | 12 | Arad | Negev | 31.27 | 35.23 | Levy G. L. |
| HUJINVPSE 333 | Olpiidae | *Minniza babylonica* | 1 | 1964 | August | 6 | Arad | Negev | 31.27 | 35.23 | Amitai P. A. |
| HUJINVPSE 392 | Olpiidae | *Minniza babylonica* | 2 | 1966 | June | 9 | Arad | Negev | 31.27 | 35.23 | Levy G. L. |
| HUJINVPSE 267 | Olpiidae | *Minniza babylonica* | 1 | 1967 | September | 24 | Arad | Negev | 31.27 | 35.23 | Tsabar G. T. |
| HUJINVPSE 305 | Olpiidae | *Minniza babylonica* | 1 | 1967 | September | 16 | Arad | Negev | 31.27 | 35.23 | Tsabar G. T. |
| HUJINVPSE 318 | Olpiidae | *Minniza babylonica* | 1 | 1967 | June | 29 | Arad | Negev | 31.27 | 35.23 | Levy G. L. |
| HUJINVPSE 313 | Olpiidae | *Minniza babylonica* | 7 | 1968 | May | 30 | Arad | Negev | 31.27 | 35.23 | Amitai P. A. |
| HUJINVPSE 354 | Olpiidae | *Minniza babylonica* | 1 | 1969 | May | 5 | En E'Tureba | Judea | 31.61 | 35.41 | Tsabar G. T. |
| HUJINVPSE 377 | Olpiidae | *Minniza babylonica* | 1 | 1969 | May | 5 | En E'Tureba | Judea | 31.61 | 35.41 | Tsabar G. T. |
| HUJINVPSE 399 | Olpiidae | *Minniza babylonica* | 1 | 1969 | May | 5 | En E'Tureba | Judea | 31.61 | 35.41 | Levy G. L. |
| HUJINVPSE 423 | Olpiidae | *Minniza babylonica* | 1 | 1969 | May | 15 | Arad | Negev | 31.27 | 35.23 | Faunistics |
| HUJINVPSE 471 | Olpiidae | *Minniza babylonica* | 1 | 1970 | April | 2 | En E'Tureba | Judea | 31.61 | 35.41 | Amitai et al. |
| HUJINVPSE 498 | Olpiidae | *Minniza babylonica* | 1 | 1970 | April | 2 | En E'Tureba | Judea | 31.61 | 35.41 | Amitai et al. |
| HUJINVPSE 502 | Olpiidae | *Minniza babylonica* | 1 | 1970 | April | 2 | En E'Tureba | Judea | 31.61 | 35.41 | Amitai et al. |
| HUJINVPSE 528 | Olpiidae | *Minniza babylonica* | 1 | 1970 | November | 16 | Wadi Daraje | Judea | 31.59 | 35.37 | Tsabar G. T. |
| HUJINVPSE 550 | Olpiidae | *Minniza babylonica* | 1 | 1971 | November | 29 | Ma'ale Adomim | Judea | 31.78 | 35.3 | Tsabar G. T. |
| HUJINVPSE 506 | Olpiidae | *Minniza babylonica* | 1 | 1973 | July | 11 | Ma'ale Shalem | Judea | 31.59 | 35.39 | Tsabar G. T. |
| HUJINVPSE 200 | Olpiidae | *Minniza babylonica* | 1 | 1942 | February | 25 | Dead Sea shore | Dead Sea | 31.52 | 35.4 | Shulov A. |
| HUJINVPSE 283 | Olpiidae | *Minniza babylonica* | 1 | 1961 | May | 6 | En Gedi | Dead Sea | 31.47 | 35.39 | Rosin R. R. |
| HUJINVPSE 317 | Olpiidae | *Minniza babylonica* | 1 | 1961 | May | 6 | En Gedi | Dead Sea | 31.47 | 35.39 | Rosin R. R. |
| HUJINVPSE 348 | Olpiidae | *Minniza babylonica* | 1 | 1961 | May | 6 | En Gedi | Dead Sea | 31.47 | 35.39 | Rosin R. R. |
| HUJINVPSE 350 | Olpiidae | *Minniza babylonica* | 1 | 1961 | May | 6 | En Gedi | Dead Sea | 31.47 | 35.39 | Rosin R. R. |
| HUJINVPSE 512 | Olpiidae | *Minniza babylonica* | 6 | 1962 | September | 11 | En Gedi | Dead Sea | 31.47 | 35.39 |  |
| HUJINVPSE 306 | Olpiidae | *Minniza babylonica* | 3 | 1963 | April | 11 | En Arus | Dead Sea | 30.94 | 35.37 | Levy G. L. |
| HUJINVPSE 481 | Olpiidae | *Minniza babylonica* | 1 | 1963 | March | 1 | Qasr el Juheiniye (Mezad Tamar) | Negev | 31.03 | 35.24 | Werner Y. |
| HUJINVPSE 337 | Olpiidae | *Minniza babylonica* | 1 | 1966 | March | 7 | Mezd Tamar (Road Be'er Sheva - S'dom) | Negev | 31.03 | 35.24 | Levy G. L. |
| HUJINVPSE 316 | Olpiidae | *Minniza babylonica* | 1 | 1967 | April | 10 | Sedom, 6 Km South of | Dead Sea | 30.98 | 35.31 | Amitai P. A. |
| HUJINVPSE 332 | Olpiidae | *Minniza babylonica* | 11 | 1968 | April | 11 | En Duyuk (NW of Jericho) | Dead Sea | 31.88 | 35.43 | Levy G. L. |
| HUJINVPSE 356 | Olpiidae | *Minniza babylonica* | 1 | 1969 | April | 20 | Duyuk (Plataeu) (Jericho) | Dead Sea | 31.88 | 35.43 | Levy G. L. |
| HUJINVPSE 398 | Olpiidae | *Minniza babylonica* | 1 | 1969 | March | 27 | En Boqeq | Dead Sea | 31.2 | 35.36 | Reichenstein S. R. |
| HUJINVPSE 424 | Olpiidae | *Minniza babylonica* | 1 | 1971 | May | 28 | En Duyuk (Jericho) | Dead Sea | 31.88 | 35.43 | Faunistics |
| HUJINVPSE 223 | Olpiidae | *Minniza babylonica* | 1 | 1972 | April | 6 | En Gedi | Dead Sea | 31.47 | 35.39 | Tsabar G. T. |
| HUJINVPSE 554 | Olpiidae | *Minniza babylonica* | 1 | 1972 | April | 6 | Ein Gedi | Dead Sea | 31.47 | 35.39 | Tsabar G. T. |
| HUJINVPSE 453 | Olpiidae | *Minniza babylonica* | 2 | 1973 | May | 16 | En Duyuk (NW of Jericho) | Dead Sea | 31.88 | 35.43 | Tsabar M. T. |
| HUJINVPSE 382 | Olpiidae | *Minniza babylonica* | 1 | 1961 | June | 30 | En Hazeva' | Arava | 30.81 | 35.25 | Amitai P. A. |
| HUJINVPSE 539 | Olpiidae | *Minniza babylonica* | 1 | 1974 | October | 22 | En Mashak | Arava | 30.8 | 35.19 | Tsabar G. T. |
| HUJINVPSE 538 | Olpiidae | *Minniza babylonica* | 1 | 1988 | September | 16 | Nahal Amaz'yahu | Arava | 30.87 | 35.3 | Shalmon B. S. |
| HUJINVPSE 226 | Olpiidae | *Minniza babylonica* | 1 | 2003 | April | 27 | Elot | Arava | 29.58 | 34.97 | Ucitel D. U. |
| HUJINVPSE 833 | Olpiidae | *Minniza babylonica* | 1 | 2003 | July | 27 | Yotvata sands | Arava | 29.9 | 35.08 | Shanas U. S. |
| HUJINVPSE 853 | Olpiidae | *Minniza babylonica* | 2 | 2003 | July | 27 | Avrona, North of En Avrona | Arava | 29.67 | 35.01 | Shanas U. S. |
| HUJINVPSE 433 | Olpiidae | *Minniza babylonica* | 4 | 2004 | April | 14 | Elot | Arava | 29.58 | 34.97 | Shanas U. S. |
| HUJINVPSE 734 | Olpiidae | *Minniza babylonica* | 1 | 2015 |  |  | Nahal Shitta | Arava | 30.09 | 35.11 |  |
| HUJINVPSE 618 | Olpiidae | *Minniza babylonica* | 1 | 2017 | September | 11,12 | Avrona | Arava | 29.67 | 35.01 |  |
| HUJINVPSE 625 | Olpiidae | *Minniza babylonica* | 1 | 2017 | May | 16,17 | Avrona | Arava | 29.67 | 35.01 |  |
| HUJINVPSE 806 | Olpiidae | *Minniza babylonica* | 1 | 2017 | May | 14-15 | Avrona | Arava | 29.67 | 35.01 |  |
| HUJINVPSE 328 | Olpiidae | *Minniza babylonica* | 1 | 1963 | May | 8 | Be'er Sheva | Negev | 31.31 | 34.79 | Amitai P. A. |
| HUJINVPSE 397 | Olpiidae | *Minniza babylonica* | 3 | 1963 | April | 10 | N. Gerar (Brosh) | Negev | 31.38 | 34.63 | Levy G. L. |
| HUJINVPSE 301 | Olpiidae | *Minniza babylonica* | 1 | 1967 | November | 13 | Kadesh Barnea | Negev | 30.9 | 34.39 | Levy G. L. |
| HUJINVPSE 361 | Olpiidae | *Minniza babylonica* | 3 | 1968 | April | 7 | Bir Asluj | Negev | 31.02 | 34.76 | Levy G. L. |
| HUJINVPSE 420 | Olpiidae | *Minniza babylonica* | 1 | 1970 | April | 5 | Mashabe' Sade | Negev | 31 | 34.78 | Faunistics |
| HUJINVPSE 225 | Olpiidae | *Minniza babylonica* | 1 | 1991 | March | 16 | Upper Nahal Karkom, Negev | Negev | 30.32 | 34.7 | Lubin Y. L. |
| HUJINVPSE 841 | Olpiidae | *Minniza babylonica* | 1 | 2022 | May | 17 | Sayeret Shaked Park | Negev-West | 31.28 | 34.65 | Peleg Jakubovits |
| HUJINVPSE 296 | Olpiidae | *Minniza babylonica* | 1 | 1962 | April | 1 | Mahtesh Gadol (Mahtesh Hathira) | Negev | 30.94 | 34.99 | Shulov A. S. |
| HUJINVPSE 484 | Olpiidae | *Minniza babylonica* | 1 | 1962 | April | 22 | Nahal Nafha | Negev | 30.73 | 34.83 | Wahrman J. W. |
| HUJINVPSE 524 | Olpiidae | *Minniza babylonica* | 1 | 1962 | April | 22 | Mahtesh Ramon | Negev | 30.59 | 34.84 | Wahrman J. W. |
| HUJINVPSE 475 | Olpiidae | *Minniza babylonica* | 1 | 1963 | May | 4 | Ramon, Giv'at Mezah | Negev | 30.66 | 34.9 | Safriel U. |
| HUJINVPSE 261 | Olpiidae | *Minniza babylonica* | 3 | 1967 | April | 10 | Mahtesh Gadol (Mahtesh Hathira) | Negev | 30.94 | 34.99 | Levy G. L. |
| HUJINVPSE 323 | Olpiidae | *Minniza babylonica* | 1 | 1967 | April | 9 | Mahtesh Gadol (Mahtesh Hathira) | Negev | 30.94 | 34.99 | Levy G. L. |
| HUJINVPSE 441 | Olpiidae | *Minniza babylonica* | 1 | 1967 | April | 3 | Arif (Negev) | Negev | 30.43 | 34.73 | Sandler H. S. |
| HUJINVPSE 262 | Olpiidae | *Minniza babylonica* | 1 | 1973 | May | 4 | S. E. of Arad | Negev | 31.2 | 35.21 | Tintpulver M. T. |
| HUJINVPSE 473 | Olpiidae | *Minniza babylonica* | 6 | 1987 | January |  | Sede Boqer | Negev | 30.86 | 34.78 | Roth V. & Roth B. |
| HUJINVPSE 586 | Olpiidae | *Minniza babylonica* | 2 | 2017 | June | 16 | Haluqim Ridge | Negev | 30.88 | 34.73 | E. Gavish Regev et al. |
| HUJINVPSE 654 | Olpiidae | *Minniza babylonica* | 1 | 2021 | October | 27 | Bikat Zin, Nahal Hatira | Negev | 30.88 | 35.11 | Yoram Zvik |
| HUJINVPSE 840 | Olpiidae | *Minniza babylonica* | 1 | 2022 | May | 17 | Tel Zafit | Negev-East | 31.74 | 34.85 | Topper A. Tzoor Magen |
| HUJINVPSE 178 | Olpiidae | *Minniza babylonica* | 1 | 1938 | December | 2 | Wadi Debich |  |  |  |  |
| HUJINVPSE 197 | Olpiidae | *Minniza babylonica* | 1 | 1938 | July | 1 | Wadi Debich |  |  |  |  |
| HUJINVPSE 831 | Olpiidae | *Minniza babylonica* | 8 | 1946 | April | 21 |  |  |  |  | Steinitz H. S. |
| HUJINVPSE 933 | Olpiidae | *Olpium* | 2 | 2022 | October | 27 | Tel Sokho | Shfelat Yehudah | 31.68 | 34.97 | EGR, Daniel Alfred, Aharon S. |
| HUJINVPSE 432 | Olpiidae | *Olpium* | 1 | 2004 | July | 20 | Yahel, South of | Arava | 30.08 | 35.13 | Shanas U. S. |
| HUJINVPSE 553 | Olpiidae | *Olpium* | 1 | 1956 | October | 1 | Be'er Sheva - Sedom road 20km | Negev | 31.2 | 34.94 |  |
| HUJINVPSE 681 | Olpiidae | *Olpium* | 2 | 1965 | March | 19 | Gan Sh'muel | Central coastal Plain | 32.45 | 34.95 |  |
| HUJINVPSE 723 | Olpiidae | *Olpium kochi* | 1 | 2020 | Feb | 16 | Haruva cave | Judea | 31.91 | 34.96 | EGR |
| HUJINVPSE 730 | Olpiidae | *Olpium kochi* | 1 | 2018 | August | 25 | Marva cave (near Meona) | Galilee | 33.02 | 35.24 | Aharon S. |
| HUJINVPSE 202 | Olpiidae | *Olpium pallipes* | 1 | 1953 | August | 11 | Caesarea | Central coastal Plain | 32.51 | 34.89 | Costa |
| HUJINVPSE 205 | Olpiidae | *Olpium pallipes* | 1 | 1944 |  |  |  |  |  |  | Shulov A. |
| HUJINVPSE 293 | Olpiidae | *Olpium pallipes balcanicum* | 2 | 1961 | May | 13 | Manara (Ramim) -Misra | Galil | 33.2 | 35.55 | Amitai P. A. |
| HUJINVPSE 308 | Olpiidae | *Olpium pallipes balcanicum* | 1 | 1961 | May | 13 | Manara (Ramim) | Galil | 33.2 | 35.55 | Amitai P. A. |
| HUJINVPSE 445 | Olpiidae | *Olpium pallipes balcanicum* | 1 | 1966 | November | 15 | Manara | Galil | 33.2 | 35.55 | Sandler H. S. |
| HUJINVPSE 245 | Olpiidae | *Olpium pallipes balcanicum* | 1 | 1961 | May | 12 | Mount Tavor | Galil | 32.69 | 35.39 | Amitai P. A. |
| HUJINVPSE 461 | Olpiidae | *Olpium pallipes balcanicum* | 1 | 1967 | May | 10 | Carmel | Carmel | 32.74 | 35.03 | Shkolnik A. S. |
| HUJINVPSE 687 | Olpiidae | *Olpium pallipes balcanicum* | 1 | 2018 | August | 20 | Ornit cave | Carmel | 32.76 | 34.99 | Aharon S. |
| HUJINVPSE 530 | Olpiidae | *Olpium pallipes balcanicum* | 1 | 1962 | August | 29 | Akko | Northern Coastal Plain | 32.94 | 35.07 | Katznelson |
| HUJINVPSE 523 | Olpiidae | *Olpium pallipes balcanicum* | 6 | 1966 | October | 14 | Allone Abba | Galil | 32.73 | 35.17 | Costa M. C. |
| HUJINVPSE 479 | Olpiidae | *Olpium pallipes balcanicum* | 1 | 1967 | March | 11 | Mishmar Ha'emek | Jezreel Valley | 32.61 | 35.14 | Costa M. C. |
| HUJINVPSE 676 | Olpiidae | *Olpium pallipes balcanicum* | 1 | 1967 | April | 6 | Mishmar Ha'emek | Jezreel Valley | 32.61 | 35.14 | Costa M. C. |
| HUJINVPSE 464 | Olpiidae | *Olpium pallipes balcanicum* | 2 | 1967 | May | 8 | Hamadyia, Near (opp.), Jordan Valley | Jordan Valley | 32.53 | 35.54 | Costa M. C. |
| HUJINVPSE 208 | Olpiidae | *Olpium pallipes balcanicum* | 1 | 1954 | October | 15 | Holon | Central coastal Plain | 32 | 34.78 |  |
| HUJINVPSE 516 | Olpiidae | *Olpium pallipes balcanicum* | 1 | 1971 | April | 23 | Rishon Le'Zion | Central coastal Plain | 31.95 | 34.78 | Tsabar G. T. |
| HUJINVPSE 221 | Olpiidae | *Olpium pallipes balcanicum* | 1 | 1973 | May | 23 | Ziqim | Southern coastal Plain | 31.61 | 34.51 | Tsabar G. T. |
| HUJINVPSE 227 | Olpiidae | *Olpium pallipes balcanicum* | 1 | 1973 | May | 23 | Ziqim | Southern coastal Plain | 31.61 | 34.51 | Tsabar G. T. |
| HUJINVPSE 419 | Olpiidae | *Olpium pallipes balcanicum* | 1 | 1973 | May | 23 | Ziqim | Southern Coastal Plain | 31.61 | 34.51 | Faunistics |
| HUJINVPSE 497 | Olpiidae | *Olpium pallipes balcanicum* | 1 | 1973 | May | 23 | Ziqim | Southern Coastal Plain | 31.61 | 34.51 | Tsabar G. T. |
| HUJINVPSE 520 | Olpiidae | *Olpium pallipes balcanicum* | 1 | 1973 | June | 21 | Rafiah | Southern Coastal Plain | 31.32 | 34.24 | Tsabar G. T. |
| HUJINVPSE 467 | Olpiidae | *Olpium pallipes balcanicum* | 1 | 1979 | May | 9 | Holon | Central coastal Plain | 32 | 34.78 | Avital E. A. |
| HUJINVPSE 235 | Olpiidae | *Olpium pallipes balcanicum* | 1 | 1954 | March | 3 | Hartuv | Shfelat Yehudah | 31.77 | 34.99 |  |
| HUJINVPSE 706 | Olpiidae | *Olpium pallipes balcanicum* | 1 | 1964 | November | 12 | Bet Gimal | Shfelat Yehudah | 31.72 | 34.98 | Levy G. L. |
| HUJINVPSE 483 | Olpiidae | *Olpium pallipes balcanicum* | 1 | 1971 | April | 22 | Azarya (in the Shephelah near Gezer) | Shfelat Yehudah | 31.9 | 34.91 | Tsabar G. T. |
| HUJINVPSE 924 | Olpiidae | *Olpium pallipes balcanicum* | 2 | 2022 | August | 16 | Nahal Socho | Shfelat Yehudah | 31.63 | 34.97 | EGR, PPS, GG |
| HUJINVPSE 311 | Olpiidae | *Olpium pallipes balcanicum* | 10 | 1944 | January | 28 | Qiryat Anavim (forest) | Judea | 31.81 | 35.12 | Steinitz H. S. |
| HUJINVPSE 266 | Olpiidae | *Olpium pallipes balcanicum* | 1 | 1960 | May | 25 | Motza (Km. 7) | Judea | 31.79 | 35.17 | Amitai P. A. |
| HUJINVPSE 339 | Olpiidae | *Olpium pallipes balcanicum* | 1 | 1961 | June | 17 | Jerusalem | Judea | 31.77 | 35.21 | Amitai P. A. |
| HUJINVPSE 456 | Olpiidae | *Olpium pallipes balcanicum* | 1 | 1974 | May | 7 | Jerusalem, Mt. Scopus | Judea | 31.79 | 35.25 | Tsabar G. T. |
| HUJINVPSE 578 | Olpiidae | *Olpium pallipes balcanicum* | 3 | 2017 | June | 19 | Soreq Nature Reserve | Judea | 31.8 | 35.07 | Opiliones curse |
| HUJINVPSE 203 | Olpiidae | *Olpium pallipes balcanicum* | 1 | 1954 | March | 24 | Wadi Fukra | Judea | 30.95 | 35.28 | Warburg M. W. |
| HUJINVPSE 204 | Olpiidae | *Olpium pallipes balcanicum* | 1 | 1961 | May | 19 | Tureiba | Judea | 31.61 | 35.41 | Wahrman J. W. |
| HUJINVPSE 353 | Olpiidae | *Olpium pallipes balcanicum* | 1 | 1963 | April | 19 | Arad | Negev | 31.27 | 35.23 | Levy G. L. |
| HUJINVPSE 504 | Olpiidae | *Olpium pallipes balcanicum* | 1 | 1963 | March | 13 | Tureiba | Judea | 31.61 | 35.41 | Werner et al. |
| HUJINVPSE 330 | Olpiidae | *Olpium pallipes balcanicum* | 1 | 1965 | May | 28 | Arad | Negev | 31.27 | 35.23 | Levy G. L. |
| HUJINVPSE 338 | Olpiidae | *Olpium pallipes balcanicum* | 1 | 1965 | May | 27 | Arad | Negev | 31.27 | 35.23 | Levy G. L. |
| HUJINVPSE 255 | Olpiidae | *Olpium pallipes balcanicum* | 1 | 1967 | September | 24 | Arad | Negev | 31.27 | 35.23 | Tsabar G. T. |
| HUJINVPSE 263 | Olpiidae | *Olpium pallipes balcanicum* | 1 | 1967 | April | 9 | Ze'elim | Negev | 31.2 | 34.54 | Levy G. L. |
| HUJINVPSE 279 | Olpiidae | *Olpium pallipes balcanicum* | 1 | 1967 | September | 24 | Arad | Negev | 31.27 | 35.23 | Tsabar G. T. |
| HUJINVPSE 289 | Olpiidae | *Olpium pallipes balcanicum* | 1 | 1967 | September | 24 | Arad | Negev | 31.27 | 35.23 | Tsabar G. T. |
| HUJINVPSE 327 | Olpiidae | *Olpium pallipes balcanicum* | 1 | 1967 | July | 7 | Wadi Kelt | Judea | 31.85 | 35.42 | Shulov S. et al. |
| HUJINVPSE 527 | Olpiidae | *Olpium pallipes balcanicum* | 1 | 1967 | June | 29 | Arad | Negev | 31.27 | 35.23 | Pener et al. |
| HUJINVPSE 343 | Olpiidae | *Olpium pallipes balcanicum* | 1 | 1969 | May | 5 | En E'Tureba | Judea | 31.61 | 35.41 | Tsabar G. T. |
| HUJINVPSE 542 | Olpiidae | *Olpium pallipes balcanicum* | 1 | 1970 | November | 16 | Wadi Daraje | Judea | 31.59 | 35.37 | Tsabar G. T. |
| HUJINVPSE 499 | Olpiidae | *Olpium pallipes balcanicum* | 1 | 1973 | July | 11 | Ma'ale Shalem | Judea | 31.59 | 35.39 | Tsabar G. T. |
| HUJINVPSE 540 | Olpiidae | *Olpium pallipes balcanicum* | 1 | 1973 | July | 11 | En E'Tureba | Judea | 31.61 | 35.41 | Tsabar G. T. |
| HUJINVPSE 692 | Olpiidae | *Olpium pallipes balcanicum* | 1 | 2018 | July | 31 | Arad cemetary | Negev | 31.27 | 35.23 | Aharon S. |
| HUJINVPSE 594 | Olpiidae | *Olpium pallipes balcanicum* | 1 | 2019 | May | 13-16 | Ashalim N. Gmalim | Dead Sea | 31.11 | 35.23 | A. Gera |
| HUJINVPSE 596 | Olpiidae | *Olpium pallipes balcanicum* | 1 | 2019 | May | 13-16 | N. Ashalim lower | Dead Sea | 31.07 | 35.31 | A. Gera |
| HUJINVPSE 674 | Olpiidae | *Olpium pallipes balcanicum* | 1 | 2021 | November | 24 | Nahal Og | Judea desert | 31.78 | 35.46 | Shacham B. |
| HUJINVPSE 252 | Olpiidae | *Olpium pallipes balcanicum* | 1 | 1961 | May | 6 | En Gedi | Dead Sea | 31.47 | 35.39 | Rosin R. R. |
| HUJINVPSE 258 | Olpiidae | *Olpium pallipes balcanicum* | 1 | 1961 | May | 6 | En Gedi | Dead Sea | 31.47 | 35.39 | Rosin R. R. |
| HUJINVPSE 275 | Olpiidae | *Olpium pallipes balcanicum* | 1 | 1961 | May | 7 | En Gedi | Dead Sea | 31.47 | 35.39 | Rosin R. R. |
| HUJINVPSE 294 | Olpiidae | *Olpium pallipes balcanicum* | 1 | 1961 | May | 7 | En Gedi | Dead Sea | 31.47 | 35.39 | Rosin R. R. |
| HUJINVPSE 374 | Olpiidae | *Olpium pallipes balcanicum* | 1 | 1961 | May | 6 | En Gedi | Dead Sea | 31.47 | 35.39 | Rosin R. R. |
| HUJINVPSE 533 | Olpiidae | *Olpium pallipes balcanicum* | 1 | 1966 | March | 20 | Har Sedom | Dead Sea | 31.09 | 35.38 | Costa M. C. |
| HUJINVPSE 439 | Olpiidae | *Olpium pallipes balcanicum* | 1 | 1967 | March | 14 | En Gedi | Dead Sea | 31.47 | 35.39 | Costa M. C. |
| HUJINVPSE 285 | Olpiidae | *Olpium pallipes balcanicum* | 1 | 1971 | March | 18 | Kalia | Dead Sea | 31.73 | 35.49 | Tsabar G. T. |
| HUJINVPSE 427 | Olpiidae | *Olpium pallipes balcanicum* | 2 | 1973 | May | 16 | En Duyuk (Jericho) | Dead Sea | 31.88 | 35.43 | Faunistics |
| HUJINVPSE 478 | Olpiidae | *Olpium pallipes balcanicum* | 1 | 1976 | June | 8 | En Duyuk [Jericho] | Dead Sea | 31.88 | 35.43 | Faunistics |
| HUJINVPSE 470 | Olpiidae | *Olpium pallipes balcanicum* | 3 | 1988 | September | 25 | Hazeva | Arava | 30.81 | 35.25 | Weinstein A. W. |
| HUJINVPSE 222 | Olpiidae | *Olpium pallipes balcanicum* | 4 | 2003 | July | 27 | Yotvata sands, East of | Arava | 29.9 | 35.08 | Shanas U. S. |
| HUJINVPSE 224 | Olpiidae | *Olpium pallipes balcanicum* | 2 | 2003 | August | 2 | Lotan, Near | Arava | 29.99 | 35.09 | Shanas U. S. |
| HUJINVPSE 229 | Olpiidae | *Olpium pallipes balcanicum* | 1 | 2003 | April | 29 | Yotvata, sands | Arava | 29.9 | 35.08 | Ucitel D. U. |
| HUJINVPSE 435 | Olpiidae | *Olpium pallipes balcanicum* | 3 | 2003 | July | 27 | Avrona, North of En Avrona | Arava | 29.67 | 35.01 | Shanas U. S. |
| HUJINVPSE 220 | Olpiidae | *Olpium pallipes balcanicum* | 6 | 2004 | April | 20 | Lotan, East of | Arava | 29.99 | 35.09 | Shanas U. S. |
| HUJINVPSE 429 | Olpiidae | *Olpium pallipes balcanicum* | 4 | 2004 | July | 18 | Lotan, East of | Arava | 29.99 | 35.09 | Shanas U. S. |
| HUJINVPSE 431 | Olpiidae | *Olpium pallipes balcanicum* | 1 | 2004 | August | 14 | Lotan, East of | Arava | 29.99 | 35.09 | Shanas U. S. |
| HUJINVPSE 621 | Olpiidae | *Olpium pallipes balcanicum* | 1 | 2017 | September | 12,13 | Avrona | Arava | 29.67 | 35.01 |  |
| HUJINVPSE 917 | Olpiidae | *Olpium pallipes balcanicum* | 1 | 2017 | September | 11,12 | Avrona | Arava | 29.67 | 35.01 |  |
| HUJINVPSE 764 | Olpiidae | *Olpium pallipes balcanicum* | 1 | 2022 |  |  | Nahal Shitta | Arava | 30.09 | 35.11 | Havlena |
| HUJINVPSE 379 | Olpiidae | *Olpium pallipes balcanicum* | 2 | 1963 | April | 10 | Ze'elim | Negev | 31.2 | 34.54 | Levy G. L. |
| HUJINVPSE 365 | Olpiidae | *Olpium pallipes balcanicum* | 1 | 1966 | June | 9 | Brosh | Negev | 31.38 | 34.63 | Levy G. L. |
| HUJINVPSE 510 | Olpiidae | *Olpium pallipes balcanicum* | 1 | 1966 | April | 18 | Bir Milkhan (Negev)(Beer Milkah) | Negev | 30.93 | 34.42 | Sandler H. S. |
| HUJINVPSE 403 | Olpiidae | *Olpium pallipes balcanicum* | 1 | 1970 | June | 1 | Be'er Sheva, 15Km South of, sand | Negev | 31.19 | 34.8 | Levy G. L. |
| HUJINVPSE 834 | Olpiidae | *Olpium pallipes balcanicum* | 1 | 1970 | April | 5 | Mashabe' Sade | Negev | 31 | 34.78 | Faunistics |
| HUJINVPSE 653 | Olpiidae | *Olpium pallipes balcanicum* | 1 | 2018 | June | 19 | Be'er Milka | Negev | 30.93 | 34.42 | Sinaiko G. |
| HUJINVPSE 756 | Olpiidae | *Olpium pallipes balcanicum* | 1 | 2022 | February | 24 | Duda'im North of Beer Sheva | Negev | 31.33 | 34.8 | Harms D., EGR, Warburg S. |
| HUJINVPSE 757 | Olpiidae | *Olpium pallipes balcanicum* | 1 | 2022 | February | 18 | Nizana wadi | Negev | 30.76 | 34.54 | Harms D., EGR, Warburg S. |
| HUJINVPSE 759 | Olpiidae | *Olpium pallipes balcanicum* | 1 | 2022 | February | 24 | Duda'im North of Beer Sheva | Negev | 31.33 | 34.8 | Harms D., EGR, Warburg S. |
| HUJINVPSE 273 | Olpiidae | *Olpium pallipes balcanicum* | 1 | 1966 | February | 22 | Bik'at Uvda | Negev | 29.95 | 34.97 | Tsabar |
| HUJINVPSE 286 | Olpiidae | *Olpium pallipes balcanicum* | 2 | 1946 | April | 19 | Wadi Ramam (Nahal Ramon) | Negev | 30.59 | 34.84 | Steinitz H. S. |
| HUJINVPSE 207 | Olpiidae | *Olpium pallipes balcanicum* | 1 | 1959 | April | 30 | Nahal Nafha | Negev | 30.73 | 34.83 | Wahrman J. W. |
| HUJINVPSE 228 | Olpiidae | *Olpium pallipes balcanicum* | 1 | 1962 | April | 22 | Nahal Nafha | Negev | 30.73 | 34.83 | Wahrman J. W. |
| HUJINVPSE 518 | Olpiidae | *Olpium pallipes balcanicum* | 1 | 1962 | April | 22 | Mahtesh Ramon | Negev | 30.55 | 34.89 | Wahrman J. W. |
| HUJINVPSE 396 | Olpiidae | *Olpium pallipes balcanicum* | 1 | 1969 | April | 15 | Mahtesh Gadol (Mahtesh Hathira) | Negev | 30.94 | 34.99 | Levy G. L. |
| HUJINVPSE 422 | Olpiidae | *Olpium pallipes balcanicum* | 2 | 1970 | April | 5 | Mahtesh Gadol (Mahtesh Hathira) | Negev | 30.94 | 34.99 | Faunistics |
| HUJINVPSE 256 | Olpiidae | *Olpium pallipes balcanicum* | 1 | 1973 | May | 4 | S. E. of Arad | Negev | 31.2 | 35.21 | Tintpulver M. T. |
| HUJINVPSE 282 | Olpiidae | *Olpium pallipes balcanicum* | 1 | 1973 | May | 4 | S. E. of Arad | Negev | 31.2 | 35.21 | Tintpulver M. T. |
| HUJINVPSE 405 | Olpiidae | *Olpium pallipes balcanicum* | 1 | 1973 | May | 4 | S. E. of Arad | Negev | 31.2 | 35.21 | Tintpulver M. T. |
| HUJINVPSE 838 | Olpiidae | *Olpium pallipes balcanicum* | 3 | 1987 | January |  | Sede Boqer | Negev | 30.86 | 34.78 | Roth V. & Roth B. |
| HUJINVPSE 290 | Olpiidae | *Olpium pallipes balcanicum* | 1 | 1992 | October | 13 | Har Hursha (W. of Ramon) | Negev | 30.57 | 34.53 | Lubin Y. L. |
| HUJINVPSE 710 | Olpiidae | *Olpium pallipes balcanicum* | 3 | 2018 | July | 21 | Sdeh Boqer | Negev mt. | 30.86 | 34.78 | Aharon S. |
| HUJINVPSE 661 | Olpiidae | *Olpium pallipes balcanicum* | 1 | 2019 | June | 13 | Mitzpe Ramon | Negev | 30.6 | 34.83 | Itay Taslev |
| HUJINVPSE 655 | Olpiidae | *Olpium pallipes balcanicum* | 1 | 2021 | November | 7 | Bikat Zin, Nahal Hatira | Negev | 30.85 | 35.06 | Yoram Zvik |
| HUJINVPSE 747 | Olpiidae | *Olpium pallipes balcanicum* | 1 | 2022 | February | 17 | Nahal Shen, Machtesh Ramon | Negev | 30.59 | 34.89 | Harms D., EGR, Warburg S. |
| HUJINVPSE 748 | Olpiidae | *Olpium pallipes balcanicum* | 1 | 2022 | February | 17 | Nahal Shen, Machtesh Ramon | Negev | 30.59 | 34.89 | Harms D., EGR, Warburg S. |
| HUJINVPSE 763 | Olpiidae | *Olpium pallipes balcanicum* | 1 | 2022 | February | 18 | near Bor Hemet | Negev | 30.59 | 34.71 | Harms D., EGR |
| HUJINVPSE 839 | Olpiidae | *Olpium pallipes balcanicum* | 4 | 2022 | May | 8 | Nahal Revivim near Retamim | Negev-centre | 31.06 | 34.69 | Aharon S. + G & R |
| HUJINVPSE 726 | Olpiidae | *Olpium pallipes balcanicum* | 1 |  |  |  | Sdeh Boqer Ben Gurion grave | Negev mt. | 30.86 | 34.78 |  |
| HUJINVPSE 232 | Olpiidae | *Olpium pallipes balcanicum* | 1 | 1974 | June | 15 | Wasit | Golan | 33.14 | 35.73 | Verechson E. V. |
| HUJINVPSE 526 | Olpiidae | *Olpium pallipes balcanicum* | 1 | 1987 | July | 7 | Mt. Hermon, 1700m | Hermon | 33.32 | 35.78 | Levy G. L. |
| HUJINVPSE 544 | Olpiidae | *Olpium pallipes balcanicum* | 1 | 1987 | July | 6 | Mt. Hermon (2000m) Esh'char valley | Hermon | 33.32 | 35.78 | Levy G. L. |
| HUJINVPSE 288 | Olpiidae | *Olpium pallipes balcanicum* | 16 | 1946 | April | 21 |  |  |  |  | Steinitz H. S. |
| HUJINVPSE 770 | Olpiidae | *Olpium pallipes balcanicum* | 1 | 2021 | September | 30 | Hazan Hills, Amatzia | Shfelat Yehudah | 31.52 | 34.91 | Pinchevsky D. |
| HUJINVPSE 782 | Olpiidae | *Olpium pallipes balcanicum* | 2 | 2021 | September | 30 | Hazan Hills, Amatzia | Shfelat Yehudah | 31.52 | 34.91 | Pinchevsky D. |
| HUJINVPSE 784 | Olpiidae | *Olpium pallipes balcanicum* | 1 | 2022 | January | 11 | Hazan Hills, Amatzia | Shfelat Yehudah | 31.52 | 34.91 | Pinchevsky D. |
| HUJINVPSE 795 | Olpiidae | *Olpium pallipes balcanicum* | 1 | 2016 | May | 20 | Avrona | Arava | 29.67 | 35.01 | E. Gavish Regev et al. |
| HUJINVPSE 802 | Olpiidae | *Olpium pallipes balcanicum* | 1 | 2016 | May | 21 | Avrona | Arava | 29.67 | 35.01 |  |
| HUJINVPSE 629 | Olpiidae | *Olpium pallipes balcanicum* | 1 | 2017 | May | 17,18 | Avrona | Arava | 29.67 | 35.01 |  |
| HUJINVPSE 807 | Olpiidae | *Olpium pallipes balcanicum* | 1 | 2017 | May | 15-16 | Avrona | Arava | 29.67 | 35.01 |  |
| HUJINVPSE 808 | Olpiidae | *Olpium pallipes balcanicum* | 1 | 2017 | May | 14-15 | Avrona | Arava | 29.67 | 35.01 |  |
| HUJINVPSE 810 | Olpiidae | *Olpium pallipes balcanicum* | 1 | 2017 | September |  | Avrona | Arava | 29.67 | 35.01 |  |
| HUJINVPSE 788 | Olpiidae | *Olpium pallipes balcanicum* | 1 | 2019 | May |  | Menucha ridge | Negev | 30.29 | 35.06 | Yael Berner |
| HUJINVPSE 792 | Olpiidae | *Olpium pallipes balcanicum* | 1 | 2020 | May | 11 | Saif wadi North of Idan | Arava | 30.85 | 35.29 | Yael Berner |
| HUJINVPSE 760 | Olpiidae | *Olpium pallipes balcanicum* | 1 | 2022 | February | 17 | Nahal Shen, Machtesh Ramon | Negev | 30.59 | 34.89 | Harms D., EGR, Warburg S. |
| HUJINVPSE 915 | Olpiidae | *Olpium pallipes balcanicum* | 2 | 2022 | August | 2 | Sdeh Boqer- Reches Halukim | Negev mt. | 30.88 | 34.73 | Aharon S. |
| HUJINVPSE 809 | Olpiidae | *Olpium pallipes balcanicum* | 1 | 2017 | May | 17-18 | Avrona | Arava | 29.67 | 35.01 |  |
| HUJINVPSE 393 | Olpiidae | *Olpium pallipes balcanicum* | 1 | 1944 | September | 4 | Har Can'an | Galil | 32.98 | 35.52 |  |
| HUJINVPSE 634 | Olpiidae | *Olpium pallipes balcanicum* | 1 | 2017 | May | 16,17 | Avrona | Arava | 29.67 | 35.01 |  |
| HUJINVPSE 796 | Olpiidae | *Olpium pallipes balcanicum* | 1 | 2017 | September | 13-14 | Avrona | Arava | 29.67 | 35.01 | E. Gavish Regev et al. |
| HUJINVPSE 923 | Olpiidae | *Olpium* | 1 | 2022 | August | 11 | Tel Sokho | Shfelat Yehudah | 31.68 | 34.97 | EGR, PPS, GG |
| HUJINVPSE 677 | Olpiidae |  | 1 | 1967 | April | 6 | Mishmar Ha'emek | Jezreel Valley | 32.61 | 35.14 | Costa M. C. |
| HUJINVPSE 835 | Syarinidae | *Hadoblothrus* | 1 | 2007 | May | 5 | Sha'at cave | West Samariah | 32.17 | 35.1 | Israel Naaman |
| HUJINVPSE 948 | Whithiidae | *Nannowithius wahrmani* | 3 | 2023 | April | 27 | Givat Sal'it | Jordan Valley | 32.36 | 35.51 | Yoram Zvik |
| HUJINVPSE 949 | Whithiidae | *Nannowithius wahrmani* | 6 | 2023 | April | 27 | Rotem | Jordan Valley | 32.34 | 35.52 | Yoram Zvik |
| HUJINVPSE 950 | Whithiidae | *Nannowithius wahrmani* | 2 | 2023 | April | 27 | Givat Sal'it | Jordan Valley | 32.36 | 35.51 | Yoram Zvik |

**Table S2.** Geographic distribution of the pseudoscorpion families in Israel (Hermon, Golan, Galilee, Hula Valley, Jezreel Valley, Coastal Plain, Central Mountains (Carmel, Samaria, Judea hills and Judea foothills), Dead Sea and Jordan Rift Valley, Judean Desert, Negev Desert and Arava Desert) (data of 1548 specimens in the collection).

| **Family** | **Hermon** | **Golan** | **Galilee** | **Hula Valley** | **Jezreel Valley** | **Coastal Plain** | **Central Mountains** | **Dead Sea & Jordan Rift Valley** | **Judean Desert** | **Negev Desert** | **Arava Desert** |
| --- | --- | --- | --- | --- | --- | --- | --- | --- | --- | --- | --- |
| Atemnidae |  |  |  |  |  |  |  |  | 1 |  |  |
| Cheiridiidae |  |  |  |  |  |  |  |  | 1 |  |  |
| Cheliferidae |  | 5 | 34 | 19 | 7 | 89 | 154 | 17 | 8 | 3 | 137 |
| Chernetidae | 18 | 1 | 13 |  | 78 | 19 | 152 | 1 |  | 2 | 3 |
| Chthoniidae |  |  | 20 | 2 |  |  | 54 |  | 1 |  |  |
| Garypidae |  |  |  |  |  | 32 |  |  |  |  |  |
| Garypinidae |  |  | 48 |  |  |  | 29 |  |  |  |  |
| Geogarypidae |  |  | 8 | 3 |  | 3 | 5 |  |  |  |  |
| Hesperolpiidae | 1 |  |  | 2 |  | 1 | 4 | 1 | 3 | 3 |  |
| Menthidae |  |  |  |  |  |  | 1 |  |  | 1 |  |
| Neobisiidae |  | 5 | 29 |  | 46 | 4 | 59 | 1 |  | 5 |  |
| Olpiidae | 2 | 1 | 12 |  | 9 | 15 | 56 | 73 | 45 | 101 | 99 |
| Syarinidae |  |  |  |  |  |  | 1 |  |  |  |  |
| Withiidae |  |  |  |  |  |  |  | 11 |  | 6 |  |

**Table S3.** Geographic distribution of the pseudoscorpion species in Israel (Hermon, Golan, Galilee, Hula Valley, Jezreel Valley, Coastal Plain, Central Mountains (Carmel, Samaria, Judea hills and Judea foothills), Dead Sea and Jordan Rift Valley, Judean Desert,NegevDesert andArava Desert). Data of 1397 fully identified specimens deposited in the collection and ***** indicates localities specified in: Beier [40], Beier [15], Halperin & Mahnert [17], Mahnert [16] and Šťáhlavský et al. [26].

| **Species** | Hermon | Golan | Galilee | Hula | Coastal Plain | Jezreel Valley | Central Mountains | Judean Desert | Negev Desert | Dead Sea & Jordan Rift Valley | Arava Desert |
| --- | --- | --- | --- | --- | --- | --- | --- | --- | --- | --- | --- |
| *Atemnus syriacus* |  |  | 1* |  |  |  |  |  |  |  |  |
| *Chelifer cancroides* |  |  |  |  | 1 |  | 6 |  | 1 | 1 |  |
| *Dactylochelifer kussariensis* |  |  |  |  | 3 |  |  |  |  |  |  |
| *Dactylochelifer pallidus* |  |  |  | 13 |  |  |  |  |  | 38* |  |
| *Hysterochelifer cyprius* |  | 5 | 14 | 1* | 55 | 1 | 71 |  |  |  |  |
| *Hysterochelifer distinguendus* |  |  |  |  |  |  | 11 |  |  |  |  |
| *Hysterochelifer gracilimanus* |  |  |  |  |  |  | 2* |  |  |  |  |
| *Hysterochelifer tuberculatus* |  |  | 9 |  | 2 | 4 | 35 |  |  |  |  |
| *Rhacochelifer corcyrensis bicolor* |  |  |  |  | 7 |  | 2 | 1 | 1 | 13 | 136 |
| *Rhacochelifer corcyrensis corcyrensis* |  |  |  |  | * |  | * |  |  | * |  |
| *Rhacochelifer lobipes* |  |  | 1 |  |  |  |  |  |  |  |  |
| *Rhacochelifer longeunguiculatus* |  |  | 1 |  | 7 |  | 7 | 7 | 1 | 3 |  |
| *Rhacochelifer maculatus* |  |  | 3* |  |  |  | 1 |  |  |  |  |
| *Rhacochelifer peculiaris latissimus* |  |  |  |  |  |  | 2 |  |  |  |  |
| *Rhacochelifer peculiaris peculiaris* |  |  |  | 6 |  |  | 5 |  |  |  | 1 |
| *Allochernes masi* |  |  | 2 |  | 5 |  | 3 |  |  |  | 3 |
| *Chernes rhodinus* |  |  | 5* |  |  |  | 22 |  |  |  |  |
| *Lamprochernes nodosus* |  |  |  |  |  |  | 3 |  |  |  |  |
| *Lamprochernes savignyi* |  | 1 |  |  | 8 | 78 | 4 |  |  | 1 |  |
| *Lasiochernes turcicus* |  |  | 9 |  |  |  | 4 |  |  |  |  |
| *Nudochernes spalacis* | 18 |  |  |  | 4 |  | 79 |  | 1 |  |  |
| *Pselaphochernes scorpioides* |  |  | 15* |  |  |  |  |  |  |  |  |
| *Ayyalonia dimentmani* |  |  |  |  |  |  | 9 |  |  |  |  |
| *Chthonius jonicus* |  |  | 4* |  |  |  | 1* |  |  |  |  |
| *Chthonius shulovi* |  |  |  |  |  |  |  | 2* |  |  |  |
| *Ephippiochthonius sacer* |  |  | 1 |  |  |  | 8 |  |  |  |  |
| *Ephippiochthonius tetrachelatus* |  |  | 1 |  |  |  | 1 |  |  |  |  |
| *Garypus beauvoisi* |  |  |  |  | 26 |  |  |  |  |  |  |
| *Garypus levantinus* |  |  |  |  | 6 |  |  |  |  |  |  |
| *Garypinus asper* |  |  | 44 |  |  |  | 7 |  |  |  |  |
| *Garypinus dimidiatus* |  |  | 4 |  |  |  | 22 |  |  |  |  |
| *Geogarypus pulcher* |  |  | 6 | 2 | 3 |  | 2 |  |  |  |  |
| *Geogarypus shulovi* |  |  | 2 | 1 |  |  | 3 |  |  |  |  |
| *Calocheirus atopos* |  |  |  | 2 | 1 |  | 3 | 3 | 3 | 1 | 1* |
| *Cardiolpium stupidum* |  |  |  |  |  |  | 1 |  |  |  |  |
| *Paramenthus shulovi* |  |  | 1* |  |  |  | 1 |  | 1 |  |  |
| *Neobisium validum* |  | 5 | 29 |  | 4 | 46 | 59 |  | 5 | 1 |  |
| *Calocheiridius libanoticus* |  |  | 2 |  | 2 |  | 4 | 2* | 1 | 1 | 1 |
| *Halominniza aegyptiaca litoralis* |  |  |  |  |  |  |  | 1 |  | 3 | 28 |
| *Minniza lindbergi* |  |  | 1* |  |  |  | 5 |  | 26 | 10 | 6 |
| *Minniza babylonica* |  |  | 1 |  | 1 |  | 16 | 24 | 31 | 46 | 21 |
| *Olpium kochi* |  |  |  |  |  |  | 1 |  | 4* |  |  |
| *Olpium pallipes* |  |  |  |  | 1 |  |  |  |  |  |  |
| *Olpium pallipes balcanicum* | 2 | 1 | 10 |  | 9 | 8 | 27 | 20 | 42 | 13 | 42 |
| *Nannowithius wahrmani* |  |  |  |  |  |  |  |  | 6 | 11 |  |

**Table S4.** Seasonal distribution of pseudoscorpion families in Israel (winter: December-February; spring: March-May; summer: June-August; autumn: September-November) (based on data of 1614 specimens in the collection).

| **Season** | **Winter** | **Spring** | **Summer** | **Autumn** |
| --- | --- | --- | --- | --- |
| Atemnidae |  | 1 | 1 |  |
| Cheiridiidae |  |  | 1 |  |
| Cheliferidae | 80 | 196 | 131 | 76 |
| Chernetidae | 82 | 83 | 90 | 32 |
| Chthoniidae | 17 | 23 | 27 | 6 |
| Garypidae |  | 9 | 15 | 8 |
| Garypinidae | 1 | 24 | 45 | 4 |
| Geogarypidae | 1 | 13 | 2 | 3 |
| Hesperolpiidae |  | 12 | 2 | 1 |
| Menthidae |  | 2 |  |  |
| Neobisiidae | 102 | 27 |  | 22 |
| Olpiidae | 39 | 242 | 126 | 67 |
| Syarinidae |  | 1 |  |  |
| Withiidae |  | 17 |  |  |

**Table S5.** Typicalhabitats occupied by the pseudoscorpion families in Israel (according to data of specimens in the collection. Data of the same specimen can contribute to more than one category, e.g. desert and under a stone, or cave and related to animals).

*Related to animals: nests, phoretic, compost heap (flies)

**Wetlands: near swamps and river banks

| **Family** | **Wetlands: swamps and river banks** | **Under Tree Bark** | **Under Stones** | **Sandy Habitat** | **Salty Habitat** | **Related to Animals: nests, phoretic, compost (flies)** | **Leaf Litter** | **Desert** | **Caves** | **Bee Hives** |
| --- | --- | --- | --- | --- | --- | --- | --- | --- | --- | --- |
| Atemnidae |  |  |  |  |  |  |  | 1 |  |  |
| Cheiridiidae |  |  |  |  |  |  |  | 1 | 1 |  |
| Cheliferidae | 19 | 166 | 22 |  |  |  | 53 | 165 | 8 | 4 |
| Chernetidae |  |  |  |  |  | 228 | 1 | 6 | 75 |  |
| Chthoniidae |  |  |  |  |  |  | 4 | 1 | 85 |  |
| Garypidae |  |  |  |  | 32 |  |  |  |  |  |
| Garypinidae |  |  | 5 |  |  |  | 35 |  |  |  |
| Geogarypidae |  |  |  |  |  |  | 10 |  |  |  |
| Hesperolpiidae |  |  | 2 |  |  | 1 |  | 6 |  |  |
| Menthidae |  |  |  |  |  |  |  | 1 |  |  |
| Neobisiidae |  |  | 2 |  |  |  | 53 | 6 | 1 |  |
| Olpiidae |  |  | 31 | 22 | 38 |  | 29 | 319 |  |  |
| Syarinidae |  |  |  |  |  |  |  |  | 1 |  |
| Withiidae |  |  |  |  |  | 17 |  | 6 |  |  |

**Table S6.** Collection method. (The collection method of 583 specimens in the collection was specified).

| **Collection method** | Pitfall Traps | Sifting | Trunk Trap | Visual Search |
| --- | --- | --- | --- | --- |
| Atemnidae |  |  |  | 1 |
| Cheiridiidae |  |  |  | 1 |
| Cheliferidae | 13 | 49 | 132 | 56 |
| Chernetidae | 3 |  |  | 77 |
| Chthoniidae | 2 | 1 |  | 53 |
| Garypidae |  |  |  |  |
| Garypinidae |  | 56 |  | 10 |
| Geogarypidae |  | 8 |  |  |
| Hesperolpiidae |  |  |  | 2 |
| Menthidae |  |  |  |  |
| Neobisiidae | 13 | 1 |  | 2 |
| Olpiidae | 58 | 21 |  | 23 |
| Syarinidae |  |  |  | 1 |
| Withiidae |  |  |  | 17 |
